# 1 **Deciphering T-wave Morphologies on ECGs: The Simplified Egg and** 2 **Changing Yolk Model and the Importance of the QTp Interval**

3 Kieran Stone<sup>1, †</sup> PhD, Dr Arvind Mistry<sup>1, †</sup> BSc (Hons), MBBS, DCH, DFFP, MBA, Daniel  
4 Cyrus <sup>2</sup> BSc, Dr John Cannon<sup>3</sup> BSc (Hons) MBBS, DRCOG, DFFP, DTher, FRCGP, FRSA,  
5 AFHEA, Ignacy Mokrzecki<sup>1</sup> BSc and Faisal I Rezwan<sup>1,\*</sup> PhD.

- 6 1. Department of Computer Science, Aberystwyth University, Wales, SY23 3DB, UK.
- 7 2. University of Surrey, Stag Hill, University Campus, Guildford, GU2 7XH, UK.
- 8 3. University of Suffolk, Waterfront Building, 19 Neptune Quay, Ipswich, IP4 1QJ, UK.

9 \* Address reprint requests and correspondence: Dr. Faisal I. Rezwan, Department of  
10 Computer Science, Aberystwyth University, Wales, SY23 3DB, United Kingdom. Email  
11 address: [f.rezwan@aber.ac.uk](mailto:f.rezwan@aber.ac.uk).

12 † Authors contributed equally to this work.

13

14

15

16

## 17 **Abstract**

18 The Electrocardiogram (ECG) serves as an integral tool in the diagnosis and  
19 management of a variety of cardiac diseases. It visualises electrical activity in the heart,  
20 offering insights into several cardiac processes, including ventricular repolarisation. The  
21 morphology of the T-wave observed on ECGs during this repolarisation phase varies and  
22 can be peaked, flat, inverted, or biphasic, each representing different cardiac  
23 conditions. Despite their prevalence, the interpretation of these patterns remains  
24 challenging. Therefore, we proposed the Simplified Egg and Changing Yolk Model, a  
25 novel idea to aid in the understanding of these T-wave morphologies in ECGs.

26 The proposed Simplified Egg and Changing Yolk Model was developed through an  
27 analysis of various T-wave morphologies and their corresponding clinical implications.  
28 The model was further designed to conceptualise the ST interval and the T-wave as a  
29 single unit, contributing to a simplified yet comprehensive understanding of ventricular  
30 repolarisation. In this context, the 'Q-wave start to T-wave peak interval' (QTp) was  
31 compared to the more commonly used 'corrected QT-interval' (QTc) for assessing the  
32 risk of arrhythmia and the effects of medication that prolong the QT-interval.

33 The Simplified Egg and Changing Yolk Model could effectively explain and interpret the  
34 variation of ECG patterns associated with ventricular repolarisation. It provided insight  
35 into the relevance of deflections seen during this phase. Importantly, the model  
36 identified QTp as a more reliable measure than QTc for assessing arrhythmia risk and  
37 evaluating medication impacts on the QT-interval.

38 Our model offers a significant enhancement to the understanding of ventricular  
39 repolarisation and its manifestation on ECGs. By emphasising the superiority of QTp

40 over QTc in clinical assessment, this model can have significant impact in clinical  
41 practice.

42 **Keywords:** Electrocardiogram (ECG), Ventricular repolarisation, T-wave morphology,  
43 QTp interval, Cardiac arrhythmia, QT interval, QTc interval, ECG interpretation, Cardiac  
44 diagnostic models, Clinical cardiology

45

46

47

48

49

50

51

52

53

54

## 55 Introduction

56 Electrocardiogram (ECG) signals provide significant information about a patient's heart  
57 processes and are widely used to investigate both normal and pathological conditions  
58 of the heart<sup>1</sup>. These signals display the time evolution of the heart's electrical activity for  
59 each heartbeat in the cardiac cycle, typically consisting of distinct depolarisation and  
60 repolarisation patterns<sup>2</sup>. These electrical activities in each cardiac cycle are detected by  
61 an ECG device and translates them into a graphical representation to identify anomalies  
62 in heart rhythm or any changes in heart morphology<sup>3,4</sup>. Any deviations in ECG traces  
63 from the 'normal pattern' (shown in Figure 1) are empirically interpreted by clinicians as  
64 'ECG abnormalities'.

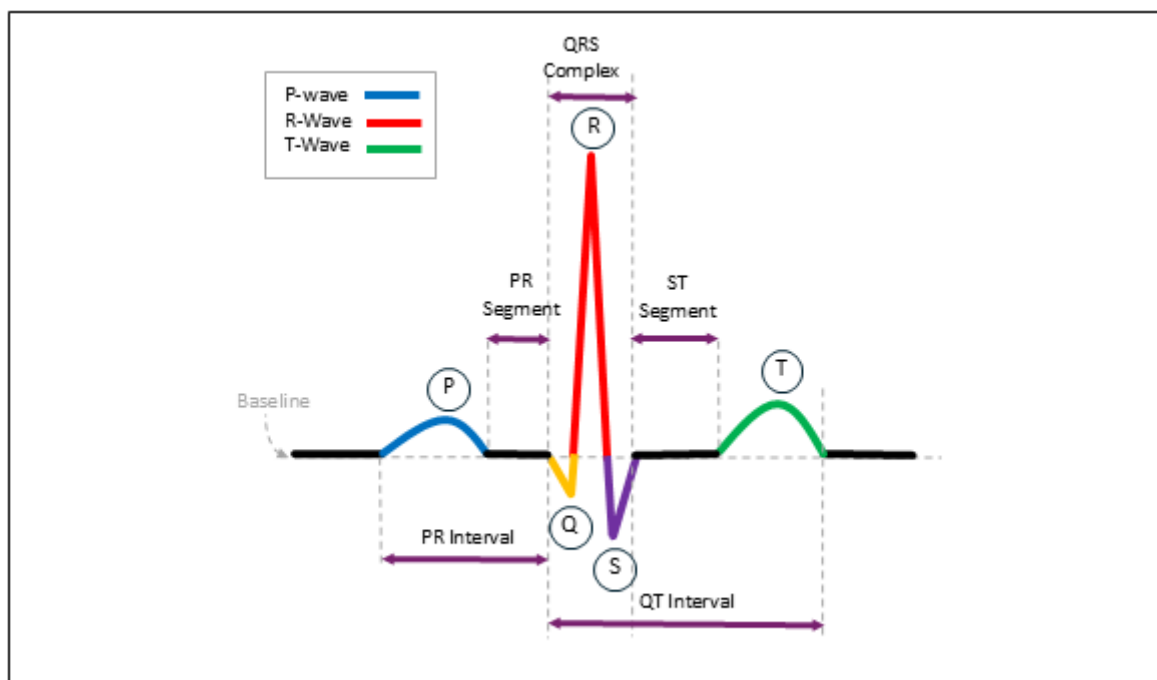

65  
66 **Figure 1: The classic ECG wave.** The classic ECG wave illustrates the essential components of cardiac  
67 electrical activity, including the P-wave, QRS complex, and T-wave, as well as their respective intervals.

68 This knowledge has evolved over many years, with clinicians matching ECG patterns to  
69 pathological changes in the heart through experience. While this approach has been

70 effective, it often lacks sufficient explanations for why certain patterns appear as they  
71 do, leading to the propagation of concepts without fully questioning the underlying  
72 reasons for the formation of these ECG traces.

73 Ventricular repolarisation as reflected in various T-wave morphologies on ECG traces, is  
74 a key aspect clinicians use to assess heart conditions. For instance, changes in the ST  
75 segment are crucial indicators of ischemia or infarct<sup>5</sup>. Despite their diagnostic  
76 importance, the underlying mechanisms causing ST elevation and ST depression  
77 remain unclear, with no definitive explanation provided for these phenomena<sup>6</sup>.

78 Additionally, the absence of a definitive explanation for the typical ‘hump’ shape of the  
79 T-wave on an ECG, coupled with the unclear mechanisms behind various atypical T-  
80 wave morphologies such as peaked, inverted, flattened, or biphasic patterns, are  
81 particularly noteworthy<sup>7,8</sup>.

82 Beyond the limited understanding of the mechanisms behind various atypical T-wave  
83 morphologies, the QT interval is a crucial measurement on ECGs. Essentially, the QT  
84 interval reflects the time required for the heart’s ventricles to contract and then relax in  
85 preparation for the next heartbeat. This is crucial in evaluating heart function, as an  
86 abnormal duration may indicate various cardiac conditions, including arrhythmias<sup>9</sup>. A  
87 prolonged QT interval is associated with an increased risk of developing a potentially  
88 life-threatening arrhythmia known as Torsades de Pointes, while a shortened QT interval  
89 may also be linked to specific cardiac disorders<sup>10,11</sup>.

90 It is also noteworthy that the QT interval is influenced by heart rate<sup>12</sup>. Consequently, it is  
91 frequently corrected for the patient’s heart rate using different formulae (e.g. Bazett’s or  
92 Fridericia’s formulae), resulting in the corrected QT interval (QTc)<sup>13</sup>. However, several

93 issues are associated with the current QTc interval when comparing cases of heart rate  
94 variability (for more details see Supplementary Material section 1).

95 This study explores ECG electrophysiology by focusing on its link to Wilson’s Central  
96 Terminal (WCT) and the origins of ECG deflections. We present a novel approach, the  
97 "Simplified Egg and Changing Yolk Model", to clarify the ventricular repolarisation  
98 process seen in the T-wave. This model explains common T-wave abnormalities,  
99 enhancing the accuracy and effectiveness of QT interval analysis.

## 100 **The Simplified Egg and Changing Yolk Model**

101 The “Simplified Egg and Changing Yolk Model” views the ventricular repolarisation  
102 process as occurring within a mass of heart muscle, simplified into an ‘egg’ shape. This  
103 shape influences the electrical deflection detected by ECG leads, depending on  
104 electrode position. In this example the green line represents the vector of lead V5,  
105 passing through the egg’s long axis. Signals detected to the right of the WCT for lead V5  
106 register as positive, while those on the left register as negative. The resulting ECG trace  
107 is the net outcome of these positive and negative signals over time (see Figure 2)<sup>14</sup>.

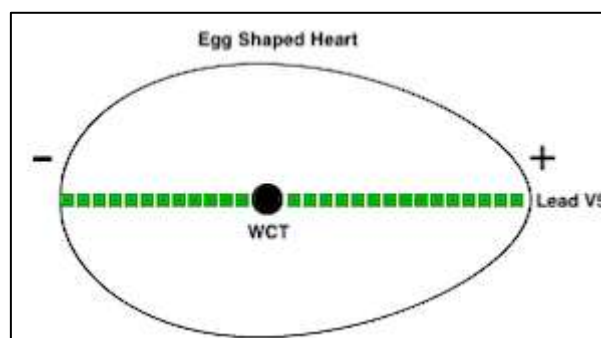

108  
109 **Figure 2: Representation of the heart in the Simplified Egg and Changing Yolk Model.** This figure  
110 depicts the heart as an egg-shaped 3D object, with the WCT at its centre.

## 111 **Normal repolarisation sequence as explained by the model**

112 In the Simplified Egg and Changing Yolk Model, the repolarisation signal expands from  
113 the WCT to the edges until the entire muscle mass has completed repolarisation. The  
114 expanding ‘yolk’ can be likened to ripples emanating from a stone dropped into still  
115 water, spreading out from the centre (WCT) in all directions but extending further on one  
116 side due to the asymmetrical egg shape. The model states that an ECG lead detects the  
117 one-dimensional repolarisation signal based on its vector through the egg shape.  
118 Signals moving in front of the WCT point produce a positive deflection, while those  
119 moving away cause a negative deflection<sup>15</sup>. The net result of these signals is registered  
120 on the ECG trace over time for that lead.

121 The sequence of the repolarising signal expanding out from the WCT to the outer  
122 boundaries of the egg shape is shown in Figure 3. The lead V5 vector is shown as a  
123 green line pointing into the egg through the WCT and in this example is looking from the  
124 right side of the egg shape. As the signal expands (shown in orange in the diagram) the  
125 net result from the positive and negative sides of the lead register as deflections  
126 (positive or negative) depending on which side has the greater signal amplitude. For a  
127 specified lead, this is represented as the following formula:

$$128 \quad LD_T = S_T - S_A$$

129 Here,  $LD_T$  is the deflection for a specified lead at time  $T$ ,  $S_T$  represents the signal  
130 components moving towards the lead and  $S_A$  represents the signal components moving  
131 away from the lead at a given time.

132 The 'components' in this model consist of the signal itself, any enhancement of the  
133 signal caused by hypertrophy, and any damage in the muscle mass (location and  
134 severity).

135 As demonstrated in Figure 3, initially the positive and negative deflections in that lead  
136 balance out yielding a net isoelectric reading until the asymmetrical part of the egg  
137 shape is reached. This is the ST segment (Figures 3a to 3c). When the signal reaches the  
138 asymmetrical part of the egg shape, termed as the 'T-zone', an excess signal on one side  
139 which causes a deflection in the lead trace. In Figure 3d, this results in a rising positive  
140 deflection, which peaks when the signal's front edge reaches the outer boundary of the  
141 'T-zone' (Figure 3e). Eventually the repolarisation signal works its way out of the 'T-zone'  
142 of the egg shape (asymmetrical part) causing the positive deflection in the lead to return  
143 to the isoelectric line (Figure 3f). Once the signal has exited, the entire shape has  
144 become repolarised, ready for the next signal.

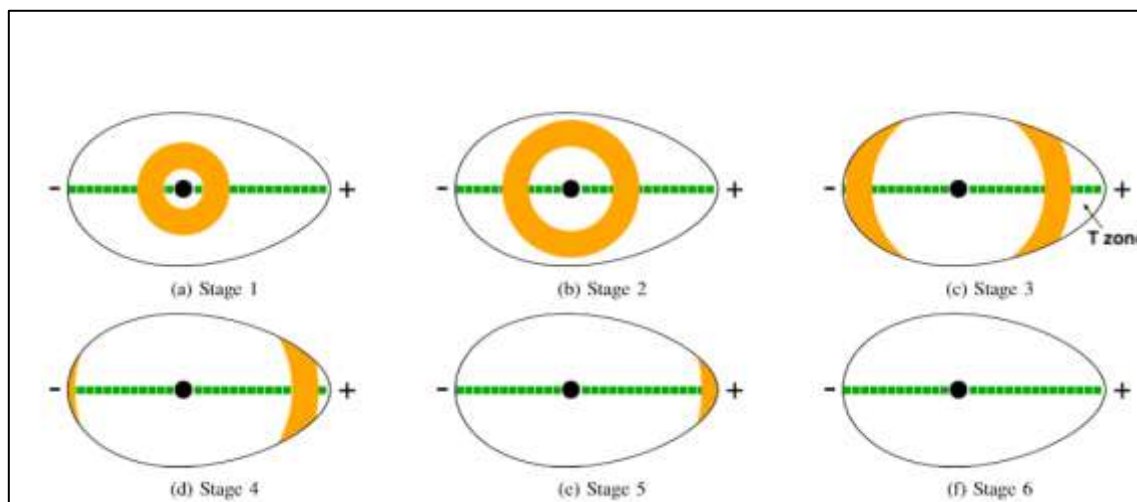

145

146 **Figure 3: The repolarisation sequence of the heart.** These diagrams show the progression of an  
147 expanding repolarisation wave from the WCT within the egg-shaped heart. The 'T-zone' refers to the  
148 asymmetric region of the egg shape, crucial in generating the T-wave in this lead.



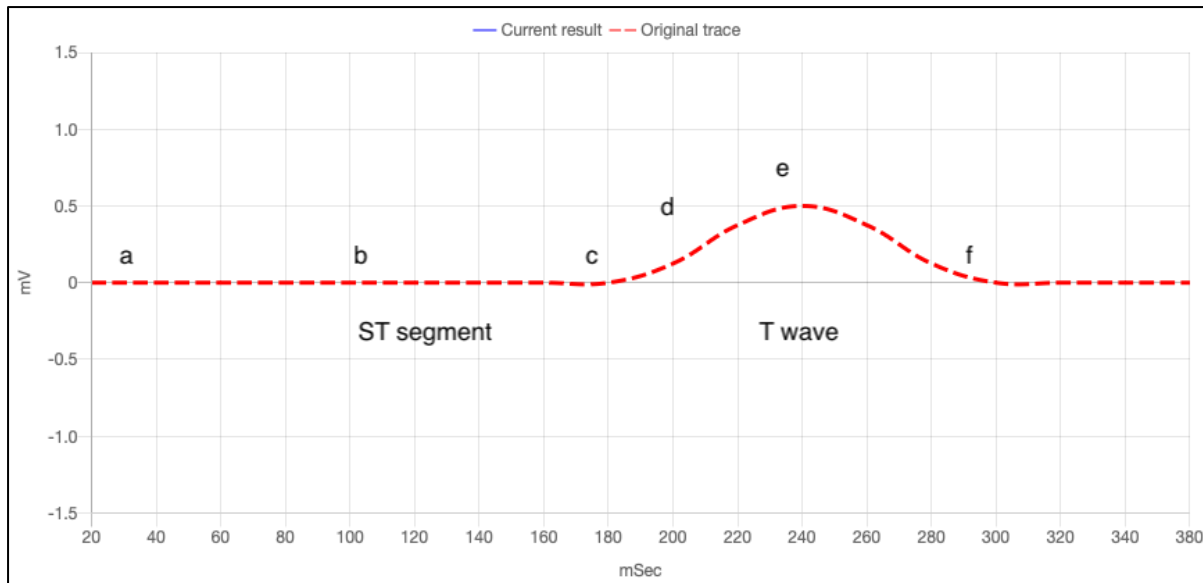

149

150 **Figure 4: The ECG trace produced by repolarisation.** This graph displays the ECG trace generated by the  
151 expanding repolarisation signal in the Simplified Egg and Changing Yolk Model. The letters correspond to  
152 the signal's position in Figures 3a to 3f.

153 From the repolarisation sequence (shown in Figure 3) and the corresponding net  
154 deflections in Figure 4, the ECG trace stays on the isoelectric line (balanced) during the  
155 ST interval. A net positive signal is detected on the lead only when the repolarisation  
156 signal enters the asymmetrical portion of the egg shape (T-zone) and continues until the  
157 signal exits this boundary. In the proposed model, this 'T-zone' is responsible for  
158 generating the T-wave observed in the ECG. The time from the onset of repolarisation to  
159 the stage when the signal reaches the boundary of the 'T-zone' (Figures 3a to 3e)  
160 corresponds to the Q-wave start to T-wave peak (QTp) interval. In contrast, the  
161 commonly used corrected QT interval (QTc) spans from the start of the Q-wave to the  
162 point when the repolarisation signal has propagated out of the 'T-zone' (from 3a to 3f in  
163 the sequence). The QTp interval is marked when the repolarisation signal reaches the 'T-  
164 zone' boundary, while the QTc interval indicates when the signal exits the boundary.

165 Comparing the QTc and QTp intervals, the QTp is more clearly defined and more reliably  
166 calculable.

## 167 Model Repolarisation Patterns with Heart Damaged Areas

168 The Simplified Egg and Changing Yolk Model offers a framework for studying the effects  
169 of damage to specific regions of heart that no longer contributes a repolarisation signal  
170 through the electrically inert area. In Figures 5a and 5c, the red areas represent where  
171 along the lead the damage, or non-electrical regions, are registered.

172 In Figure 5a, as the repolarisation signal spreads, there is a deficit of positive deflection  
173 and this results in ST depression because the signal seems to be moving away from the  
174 lead overall. Since the damage is close to the WCT, the ST depression occurs right from  
175 the start of repolarisation. If the damaged region of the heart is situated at a greater  
176 distance from the WCT, the resulting ST depression will manifest later. Consequently,  
177 the onset of ST depression signifies the location of damage relative to the WCT and the  
178 direction of the lead. In Figure 5c, the damage is on the opposite side of the WCT, which  
179 results in ST elevation in this case because of the lack of transmission in negative  
180 deflection.

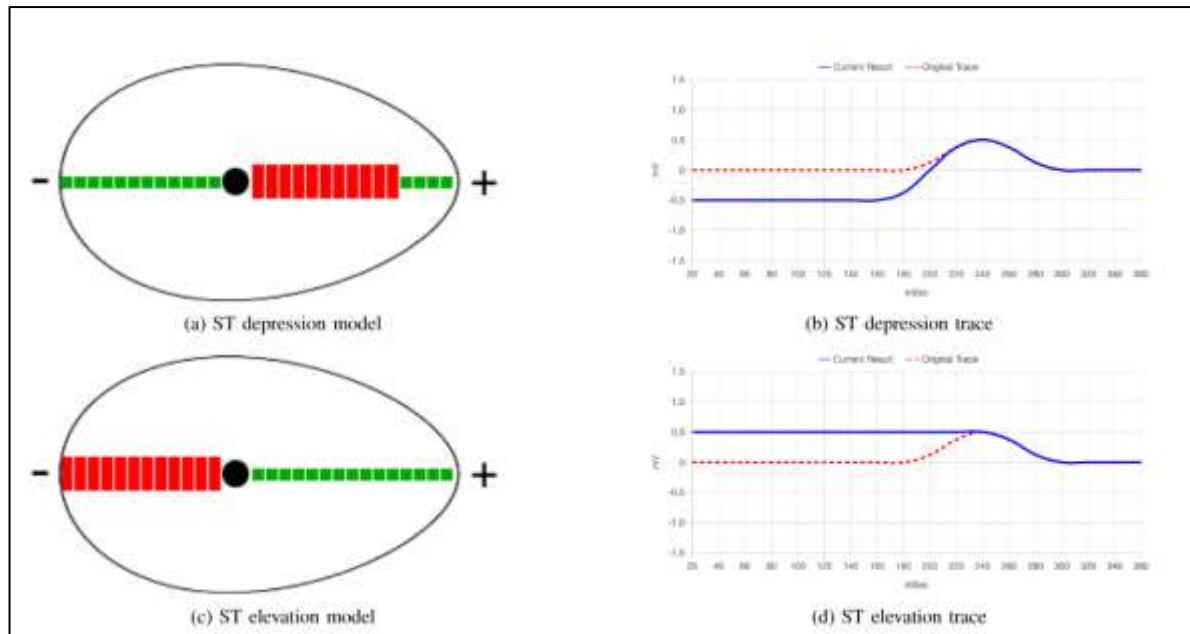

181

182 **Figure 5: ST depression and ST elevation models and traces.** The diagrams illustrate how ST depression  
183 and ST elevation traces on an ECG can result from the Simplified Egg and Changing Yolk Model.

184 The proposed model can also be used to investigate other abnormal T-wave  
185 morphologies. The sequence in Figure 6 represents the regions on the lead which  
186 register the damaged areas and their resulting traces. They depict the commonly seen  
187 abnormal T-wave morphologies of higher T-waves, flattened T-waves, inverted T-waves,  
188 and biphasic T-waves along with drawings of their registered damaged areas within the  
189 egg shape.

190 In Figure 6a, the higher T-wave is depicted as resulting from muscle damage on the  
191 negative side of the WCT for the lead. However, other factors such as hypertrophy and  
192 ion imbalance, can also produce higher T-waves. Note that while the settings for the  
193 flattened and inverted T-waves (Figures 6c and 6e) seem similar, they differ in  
194 hypertrophy and damage severity to reproduce the T-wave morphologies. Further  
195 details on these examples can be explored using the webtool available at: [https://t-](https://t-wave.aber.ac.uk/)  
196 [wave.aber.ac.uk/](https://t-wave.aber.ac.uk/)

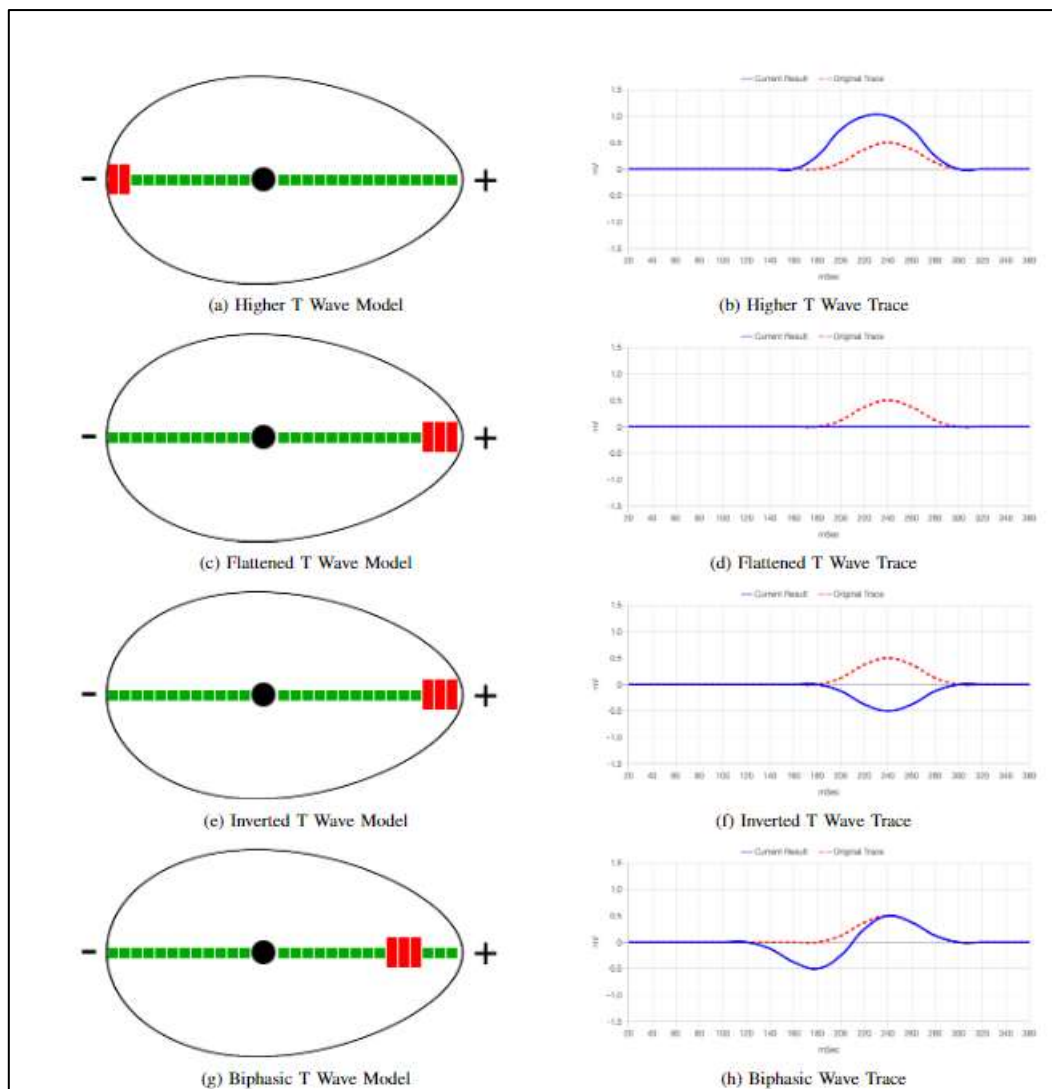

197

198 **Figure 6: Representation of Abnormal T-wave Morphologies on ECG Traces.** These diagrams  
199 demonstrate how the Simplified Egg and Changing Yolk Model can reproduce four common abnormal T-  
200 wave morphologies on an ECG by placing damaged registered areas (red blocks) in specific parts of the  
201 egg shape.

202 A comprehensive range of T-wave shapes, along with corresponding real-world ECG  
203 examples can illustrate how this simple, yet versatile model can emulate various real-  
204 life T-wave abnormalities and explain the presence of three distinct T-wave shapes  
205 (positive, biphasic, and inverted) following ST depression, compared to the single T-  
206 wave shape (positive) observed after ST elevation in lead V5. The proposed model also  
207 demonstrates how the model can account for variations in T-wave shapes in 'normal

208 ECGs', depending on the orientation and shape of the heart relative to lead direction  
209 (see Supplementary Material section 2).

210

## 211 **Discussion**

212 We have demonstrated that the novel Simplified Egg and Changing Yolk Model is a  
213 multifaceted model for illustrating the conditions that give rise to various T-wave  
214 morphologies in ECG traces. The proposed model specifically applies to the  
215 repolarisation process, with the T-wave representing ventricular repolarisation. Since  
216 ventricular depolarisation travels quickly through cardiac nerve fibres, like the bundle of  
217 His, bundle branches, and Purkinje fibres, necessitating a different model. In contrast,  
218 the ventricular repolarisation process, which resets the depolarised ventricular  
219 muscles, is not facilitated by these nerve fibres, making the Simplified Egg and  
220 Changing Yolk Model suitable for replicating this process. While the examples used lead  
221 V5, these principles apply to other ECG leads as well. However, the orientation of each  
222 lead within the 'egg shape' must be considered. Lead V5 was chosen for demonstration  
223 due to its alignment with the heart apex, matching the most asymmetric part of the 'egg  
224 shape'.

225 The implications of this model of ventricular repolarisation challenges the conventional  
226 view that the repolarisation process commences only at the conclusion of the S wave.  
227 Instead, it suggests repolarisation starts with the Q-wave as depolarisation begins and  
228 continues as a single process through to the end of the T-wave. Consequently, the ST  
229 interval and T-wave interval should be considered as a unified process, rather than

230 being divided into separate components as is currently believed<sup>16</sup>. Secondly, given that  
231 ST depression in one lead manifests as ST elevation in its reciprocal lead, it becomes  
232 difficult to reliably interpret ST depression as indicative of myocardial ischaemia or ST  
233 elevation as representative of myocardial infarction<sup>17</sup>. Using this model, it is more  
234 appropriate to consider the entire repolarisation process as a single unit and attempt to  
235 determine ‘where’ the myocardial issue is occurring (rather than focusing on ‘what’ is  
236 happening). Other investigative methods, such as cardiac enzyme analysis, should be  
237 used as markers for potential myocardial damage. Thirdly, there are implications for use  
238 of the QTc interval. Currently the QTc interval ends when repolarisation exits the ‘T-zone’  
239 of the Simplified Egg and Changing Yolk Model. This approach uses the ‘front’ of the  
240 wave of the repolarisation signal (Q-wave start) and the ‘tail end’ of the wave of the  
241 repolarisation signal when it exits the ‘T-zone’. In practice, challenges arise in  
242 calculating the QTc interval when a U-wave appears before the T-wave ends or when a  
243 P-wave begins before the T-wave concludes. For examples of these challenges in QTc  
244 calculation, please refer to Supplementary Material section 1.

245 There is no universally accepted formula for calculating the QTc interval. Multiple  
246 recognised formulae exist, each with advantages and limitations, leading to potential  
247 discrepancies in clinical practice<sup>18</sup>. The most commonly used are Bazett’s, Fridericia’s,  
248 Hodges’ and Framingham’s formulae. The choice of the most appropriate formula  
249 should be carefully considered based on the clinical context and population studied<sup>19</sup>.

250 The proposed model suggests measuring the interval from the onset of the Q-wave up  
251 to the T-wave peak, termed the QTp interval. This interval represents the duration from  
252 the start of repolarisation at the Q-wave to the outer boundary of the ‘T-zone’ at the T-  
253 wave peak. Measuring the QTp interval reduces ambiguity in the QT interval

254 measurement and simplifies the automated detection of the T-wave peak. This is  
255 contrary to calculating the T-wave end based on the different formulae used by the ECG  
256 machine and this approach is supported by multiple studies<sup>20-22</sup>. For biphasic T-waves,  
257 the highest T-wave peak should be used, and for inverted T-waves the lowest trough  
258 position is used. However, in cases of flat T-waves, neither the QTp nor the QTc interval  
259 can be determined. The proposed model lends stronger support to the case for using  
260 the QTp interval as a more reliable and accurate parameter, especially in assessing the  
261 risk of arrhythmia caused by potential 'R on T phenomenon', and in measuring the  
262 effects of medication on the QT interval<sup>23-25</sup>.

263 Finally, the Simplified Egg and Changing Yolk Model can be used to reproduce various  
264 ECG abnormalities, including ST elevation, ST depression and T-wave flattening or  
265 inversion. By selecting multiple blocks to simulate "damage" in the model, one can  
266 reflect the distribution of the affected artery. Future investigations could modify the  
267 model to incorporate coronary artery distribution, aiming to replicate the effects of  
268 occlusion in specific arteries.

## 269 **Conclusion**

270 In conclusion, this study introduces the Simplified Egg and Changing Yolk Model, a  
271 comprehensive framework that enhances our understanding of T-wave morphologies  
272 on ECGs during ventricular repolarisation. By offering a unified model that explains  
273 various T-wave patterns, this work could improve ECG interpretation and lead to more  
274 accurate diagnoses of cardiac abnormalities.

275 Furthermore, the proposed model underscores the limitations of the widely used QTc  
276 interval in assessing arrhythmia risk and supports the QTp interval as a more reliable

277 alternative. By demonstrating the QTp interval's effectiveness in evaluating arrhythmia  
278 risk and the impact of QT-prolonging medications, this model offers a valuable tool for  
279 improving risk stratification and patient management in cardiac diseases. We  
280 recommend adopting the more reliable QTp (Q-wave start to T-wave peak) interval over  
281 the QTc interval, especially for assessing medication effects on the QT interval.

282 Our work has important implications for clinical practice and research, offering a better  
283 understanding of ventricular repolarisation on ECGs. This can improve decision-making  
284 in patient management and aid in developing new therapeutic strategies. Our  
285 recommendation for the QTp interval paves the way for future research to validate its  
286 utility across different populations and settings and to refine the Simplified Egg and  
287 Changing Yolk Model. This study represents a significant step toward improving the  
288 assessment and management of cardiac conditions, with the potential to enhance  
289 patient outcomes and overall cardiovascular health.

290 Building on this work, we plan to explore the ventricular repolarisation signal's  
291 behaviour as it propagates beyond the T-zone within the egg shape, potentially  
292 uncovering the origin of the U-wave. We also aim to apply this model to the atrial  
293 repolarisation process and explore its broader implications. By expanding our insights,  
294 we can advance understanding in cardiac electrophysiology, leading to improved  
295 patient care and outcomes.

## 296 **References**

- 297 1. Kaplan Berkaya S, Uysal AK, Sora Gunal E, Ergin S, Gunal S, Gulmezoglu MB: A  
298 survey on ECG analysis. Biomedical Signal Processing and Control 2018; 43:216–  
299 235.



- 300 2. Kligfield P, Gettes LS, Bailey JJ, et al.: Recommendations for the Standardization  
301 and Interpretation of the Electrocardiogram: Part I: The Electrocardiogram and Its  
302 Technology: A Scientific Statement From the American Heart Association  
303 Electrocardiography and Arrhythmias Committee, Council on Clinical Cardiology;  
304 the American College of Cardiology Foundation; and the Heart Rhythm Society  
305 *Endorsed by the International Society for Computerized Electrocardiology*.  
306 *Circulation* 2007; 115:1306–1324.
- 307 3. Nielsen JC, Lin Y-J, De Oliveira Figueiredo MJ, et al.: European Heart Rhythm  
308 Association (EHRA)/Heart Rhythm Society (HRS)/Asia Pacific Heart Rhythm Society  
309 (APHRS)/Latin American Heart Rhythm Society (LAHRS) expert consensus on risk  
310 assessment in cardiac arrhythmias: use the right tool for the right outcome, in the  
311 right population. *EP Europace* 2020; 22:1147–1148.
- 312 4. Hammad M, Maher A, Wang K, Jiang F, Amrani M: Detection of abnormal heart  
313 conditions based on characteristics of ECG signals. *Measurement* 2018; 125:634–  
314 644.
- 315 5. Savonitto S: Prognostic Value of the Admission Electrocardiogram in Acute  
316 Coronary Syndromes. *JAMA* 1999; 281:707.
- 317 6. Katz AM: T Wave “Memory”: Possible Causal Relationship to Stress-Induced  
318 Changes in Cardiac Ion Channels? *Cardiovasc electrophysiol* 1992; 3:150–159.
- 319 7. Cardona A, Zareba KM, Nagaraja HN, et al.: T-Wave Abnormality as  
320 Electrocardiographic Signature of Myocardial Edema in Non-ST-Elevation Acute  
321 Coronary Syndromes. *JAHA* 2018; 7:e007118.
- 322 8. Klabunde RE: *Cardiovascular physiology concepts*. 2. ed. Philadelphia: Wolters  
323 Kluwer [u.a.], 2012,.
- 324 9. Sagie A, Larson MG, Goldberg RJ, Bengtson JR, Levy D: An improved method for  
325 adjusting the QT interval for heart rate (the Framingham Heart Study). *The*  
326 *American Journal of Cardiology* 1992; 70:797–801.
- 327 10. Goldenberg I, Moss AJ, Zareba W: QT Interval: How to Measure It and What Is  
328 “Normal.” *Cardiovasc electrophysiol* 2006; 17:333–336.
- 329 11. Panikkath R, Reinier K, Uy-Evanado A, et al.: Prolonged Tpeak-to-Tend Interval on  
330 the Resting ECG Is Associated With Increased Risk of Sudden Cardiac Death. *Circ*:  
331 *Arrhythmia and Electrophysiology* 2011; 4:441–447.
- 332 12. Al-Khatib SM, LaPointe NMA, Kramer JM, Califf RM: What Clinicians Should Know  
333 About the QT Interval. *JAMA [Internet]* 2003 [cited 2024 Dec 10]; 289. Available  
334 from: <http://jama.jamanetwork.com/article.aspx?doi=10.1001/jama.289.16.2120>
- 335 13. Giudicessi JR, Noseworthy PA, Ackerman MJ: The QT Interval: An Emerging Vital  
336 Sign for the Precision Medicine Era? *Circulation* 2019; 139:2711–2713.

- 337 14. Wilson FN, MacLeod AG, Barker PS: The T deflection of the electrocardiogram.  
338 Trans Assoc Am Physicians 46:29–38.
- 339 15. Meijborg VMF, Conrath CE, Opthof T, Belterman CNW, De Bakker JMT, Coronel R:  
340 Electrocardiographic T Wave and its Relation With Ventricular Repolarization Along  
341 Major Anatomical Axes. *Circ: Arrhythmia and Electrophysiology* 2014; 7:524–531.
- 342 16. Goldberger AL, Shvilkin A, Goldberger ZD, Goldberger AL: Goldberger’s clinical  
343 electrocardiography: a simplified approach. Ninth Edition. Philadelphia, PA:  
344 Elsevier, 2017,.
- 345 17. Pollehn T, Brady WJ, Perron AD, Morris F: The electrocardiographic differential  
346 diagnosis of ST segment depression. *Emergency Medicine Journal* 2002; 19:129–  
347 135.
- 348 18. Vandenberk B, Vandael E, Robyns T, et al.: Which QT Correction Formulae to Use  
349 for QT Monitoring? *JAHA* 2016; 5:e003264.
- 350 19. Suárez-León AA, Varon C, Willems R, Van Huffel S, Vázquez-Seisdedos CR: T-wave  
351 end detection using neural networks and Support Vector Machines. *Computers in*  
352 *Biology and Medicine* 2018; 96:116–127.
- 353 20. Madeiro JPV, Nicolson WB, Cortez PC, et al.: New approach for T-wave peak  
354 detection and T-wave end location in 12-lead paced ECG signals based on a  
355 mathematical model. *Medical Engineering & Physics* 2013; 35:1105–1115.
- 356 21. Schläpfer J, Wellens HJ: Computer-Interpreted Electrocardiograms. *Journal of the*  
357 *American College of Cardiology* 2017; 70:1183–1192.
- 358 22. Postema P, Wilde A: The Measurement of the QT Interval. *CCR* 2014; 10:287–294.
- 359 23. Liu MB, Vandersickel N, Panfilov AV, Qu Z: R-From-T as a Common Mechanism of  
360 Arrhythmia Initiation in Long QT Syndromes. *Circ: Arrhythmia and*  
361 *Electrophysiology* 2019; 12:e007571.
- 362 24. Sundqvist K, Sylvén C: Cardiac repolarization properties during standardized  
363 exercise test as studied by QT, QT peak and terminated T-wave intervals. *Clinical*  
364 *Physiology* 1989; 9:419–425.
- 365 25. Haapalahti P, Viitasalo M, Perhonen M, et al.: Comparison of QT peak and QT end  
366 interval responses to autonomic adaptation in asymptomatic LQT1 mutation  
367 carriers: QT peak versus QT end responses in LQT1. *Clinical Physiology and*  
368 *Functional Imaging* 2011; 31:209–214.

369
