# Supplementary material for: Deciphering T-wave Morphologies on ECGs: The Simplified Egg and Changing Yolk Model and the Importance of the QTp Interval
Source: bioRxiv or medRxiv preprint supplement (doi:10.1101/2024.12.17.24318926), 2024-12-18
Supplement: Supplementary file [file media-1.pdf]

# 1 Supplementary Materials

## 2 Section 1: QTc Interval Analysis

### 3 1.1 Introduction

4 The following supplementary material delves into key concepts and challenges of the QTc interval,  
5 which adjusts the time between the start of the Q wave and the end of the T wave for heart rate,  
6 serving as a crucial biomarker for cardiovascular health. Furthermore, it delves into the nuances  
7 involved in QTc calculation, which often pose difficulties in both clinical and research settings. This  
8 supplementary information is structured into two main parts. The first part, "Complexities and  
9 Challenges in QTc Interval Analysis: Enhancing Heart Rate Variability Assessments," provides a deeper  
10 understanding of physiological variations and their impact on QTc intervals. Here, we address  
11 potential measurement errors due to U waves, disparities caused by regional repolarisation  
12 differences, and the critical aspects of inter-lead variability. Additionally, we elaborate on the  
13 pressing need for a more uniform and robust method of standardisation within this analysis. The aim  
14 of this part is to emphasise the importance of comprehensive QTc analysis, particularly considering  
15 its relevance to heart rate variability assessments.

16 The second part, "Key Challenges Associated with QTc Calculation," focuses on the intricate task of  
17 calculating the QTc interval accurately. The sections are devoted to explicating the complex  
18 relationship between heart rate and QTc calculation and highlighting the complexities of QT interval  
19 identification. An overview is provided on the implications of drug-induced QTc prolongation, the  
20 influence of electrolyte imbalances, and the impact of specific disease states on the QTc interval. This  
21 part intends to present a complete picture of the challenges associated with the calculation of QTc  
22 and the influencing factors.

23 Collectively, this supplementary material aims to provide an in-depth view of the complexities and

24 challenges associated with QTc interval analysis and calculation. The objective is to stimulate further  
25 research, encourage dialogue on standardisation, and improve methodologies for a more accurate  
26 understanding of heart rate variability, which plays a pivotal role in cardiovascular health. We hope  
27 that this additional information assists readers in understanding the nuances of QTc interval analysis  
28 and its calculation, thereby enhancing the main findings and implications of our research paper.

29

## 30 **1.2 Part 1. Complexities and Challenges in QTc Interval Analysis: Enhancing Heart Rate**

### 31 **Variability Assessments**

32 The corrected QT interval (QTc) represents the duration from the start of the Q wave to the end of  
33 the T wave in an electrocardiogram (ECG), a time span that signifies the total time taken for  
34 ventricular depolarisation and repolarisation. Clinically, it is a vital parameter to measure as it can  
35 reveal potential cardiac arrhythmias. However, using QTc interval for comparing heart rate variability  
36 presents several challenges. These include representing physiological changes within patients,  
37 addressing measurement errors caused by U waves superimposing on the T wave, accounting for  
38 regional repolarisation differences within an individual's heart, and managing inter-lead variability  
39 along with a consensus on a standard lead to use.

#### 40 **1.2.1 Physiological Variations and QTc interval**

41 The QTc interval is sensitive to multiple physiological factors. These include autonomic nervous  
42 system activity<sup>1</sup>, metabolic changes<sup>2</sup>, circadian rhythms<sup>3</sup>, and physical activity<sup>4</sup> among  
43 others. Each of these factors can significantly impact the heart rate, and consequently the QTc  
44 interval. For instance, during periods of physical exercise or stress, the activity of the sympathetic  
45 nervous system increases, leading to a higher heart rate. This increase in heart rate usually shortens  
46 the QTc interval. Conversely, during periods of rest or sleep, when the parasympathetic nervous  
47 system is more active, the heart rate decreases, typically resulting in a lengthened QTc interval.  
48 Metabolic changes, such as hypoglycemia or hyperglycemia, can also influence the QTc interval. Both

49 these states can lead to changes in the electrophysiological activity of the heart, potentially altering  
50 the QTc duration.

51 Similarly, the body's internal biological clock, or circadian rhythm, also has a profound impact on  
52 heart rate variability. The heart rate and QTc interval have been found to exhibit diurnal variations,  
53 with changes occurring across the day and night.

54 Given this sensitivity to physiological changes, it's crucial to normalise these variables when  
55 comparing QTc intervals among different cases. For example, comparing the QTc interval of a person  
56 at rest with someone who has just finished exercising could lead to incorrect conclusions due to the  
57 significant physiological differences between the two states. Therefore, accurate comparisons  
58 necessitate that the physiological state at the time of QTc measurement be similar or taken into  
59 account during interpretation<sup>5</sup>.

#### 60 1.2.2 Measurement Errors Due to U waves

61 U waves are a part of the ECG that follow the T wave and precede the next P wave. They are  
62 generally small, often not exceeding 1-2 mm in height on the ECG, and their origin is still a matter of  
63 ongoing research. One of the common challenges in the measurement of the QTc interval is the  
64 potential overlap of the U wave with the T wave, which may cause an overestimation of the QTc  
65 interval duration<sup>6</sup>. This superimposition can occur due to several reasons, such as slower heart  
66 rates, electrolyte imbalances like hypokalemia, or the use of certain medications. When the U wave  
67 overlaps with the T wave, it extends the apparent repolarisation time leading to an overestimation of  
68 the QTc interval. This can be particularly problematic in situations where a precise measurement of  
69 the QT interval is critical, such as in the diagnosis of Long QT Syndrome.

70 To overcome this challenge, it is important to enhance the ECG analysis algorithms to detect and  
71 account for U waves. Advanced signal processing techniques, including wavelet transformation and  
72 machine learning algorithms, could be employed to more accurately differentiate T waves from  
73 superimposed U waves. This would allow for a more precise measurement of the QTc interval and a  
74 better comparison of heart rate variability between different cases.

### 75 1.2.3 Regional Repolarisation Differences

76 The human heart, despite being a single organ, possesses intricate regional differences in its  
77 electrophysiological activity. These differences are more prominent during the repolarisation phase,  
78 represented by the T wave on the ECG. The duration and shape of the T wave, and hence the QTc  
79 interval, may vary across different regions of the heart, based on factors like myocardial thickness,  
80 cell type, and local autonomic innervation. Regional differences in repolarisation times can result  
81 from several physiological and pathological conditions<sup>7,8</sup>. For example, conditions like myocardial  
82 ischemia or infarction, electrolyte imbalances, or genetic disorders can create regional heterogeneity  
83 in the heart's electrical activity. This variability is usually reflected in the ECG as T wave alterations.  
84 However, when using the QTc interval to compare heart rate variability, these regional differences  
85 can pose a challenge. Since the ECG leads capture the electrical activity from different angles, this  
86 can result in varying QTc intervals, depending on the repolarisation time of the specific region viewed  
87 by the lead<sup>9</sup>.

88 To address this, innovative techniques are required that can account for the regional differences in  
89 repolarisation times. This might involve using multiple leads to capture a more global measure of  
90 repolarisation or incorporating advanced computational models that can predict the regional  
91 variations in QTc intervals based on individual characteristics.

### 92 1.2.4 Inter-Lead Variability and Standardisation

93 In an ECG, each lead offers a unique 'view' of the heart's electrical activity, owing to its specific  
94 orientation with respect to the heart. Therefore, the QT interval recorded can vary significantly from  
95 one lead to another. This variation, termed as inter-lead variability, can introduce potential  
96 inaccuracies when comparing QTc intervals among different cases or even within the same individual  
97 over time if different leads are used.

98 Certain leads, such as the precordial leads V2-V3, are known to display longer QT intervals, whereas  
99 others like lead I and aVL often show shorter intervals<sup>10</sup>. Furthermore, the presence of cardiac  
100 pathologies or even normal anatomical variations can amplify these differences. Due to this inherent

101 variability, the choice of lead used for measuring the QTc interval becomes critically important.  
102 However, there is a lack of consensus on a standard lead to use for QTc measurement, which can  
103 confound comparisons of heart rate variability<sup>11</sup>.  
104 To address this, it is essential to establish a standardised protocol for the selection of the lead for QTc  
105 measurement. This might involve selecting the lead that best represents the global QTc interval or  
106 consistently using the same lead for all measurements. Furthermore, the development of multilead  
107 or vectorcardiographic approaches, which consider the information from multiple leads  
108 simultaneously, could offer a more comprehensive view of the QTc interval and help overcome the  
109 limitations posed by inter-lead variability.

110

### 111 **1.3 Part 2. Key challenges associated with QTc calculation.**

#### 112 1.3.1 Heart Rate and QTc Calculation

113 The QT interval represents the time taken for both ventricular depolarisation and repolarisation. It is  
114 measured from the beginning of the QRS complex to the end of the T wave on the ECG. However, the  
115 raw QT interval is affected by heart rate - it shortens as the heart rate increases and lengthens as the  
116 heart rate decreases. Thus, to allow comparisons between different heart rates, a corrected QT  
117 interval (QTc) is used.

118 Various correction formulas have been proposed over the years to adjust the QT interval for heart  
119 rate, with the most commonly used being Bazett's, Fridericia's, Framingham's, and Hodges' formulas.  
120 Bazett's formula, the most commonly used, is defined as  $QTc = QT/\sqrt{RR}$ , where RR is the interval from  
121 the onset of one QRS complex to the onset of the next, measured in seconds. Despite its widespread  
122 use, Bazett's formula tends to overcorrect at high heart rates and undercorrect at low heart rates,  
123 leading to potential inaccuracies<sup>4</sup>. Fridericia's formula, defined as  $QTc = QT/RR^{1/3}$ , and  
124 Framingham's formula, defined as  $QTc = QT + 0.154*(1-RR)$ , have been proposed as alternatives to  
125 address the shortcomings of Bazett's formula. Hodges' formula, defined as  $QTc = QT + 1.75*(heart$   
126  $rate - 60)$ , is another alternative that is considered to be more accurate across different heart rates<sup>12</sup>.

127 Despite these various correction methods, none are perfect, and each has its limitations. For  
128 example, all these formulas are based on population averages and may not accurately correct the QT  
129 interval in individual cases. Moreover, these corrections are derived from resting ECGs and may not  
130 apply during exercise or other states of increased heart rate. Thus, QTc calculation remains a complex  
131 task, especially in situations with significant heart rate variability<sup>13</sup>.

### 132 1.3.2 QT Interval Identification

133 QT interval measurement is the basis for calculating the QTc. It begins with the start of the Q wave  
134 and ends at the end of the T wave on the ECG. However, accurate identification of these points can  
135 sometimes be challenging due to a number of factors.

136 Firstly, the Q wave can sometimes be small and difficult to distinguish, particularly in certain ECG  
137 leads. This can lead to variability in identifying the start of the QT interval.

138 Secondly, defining the end of the T wave, and hence the QT interval, can often be tricky. The T wave  
139 end is generally defined as the intersection of the tangent to the steepest downslope of the T wave  
140 and the baseline. However, in certain cases, the T wave can be low in amplitude, biphasic, or can  
141 merge with a U wave, making it challenging to accurately identify its end. Improper identification of  
142 the Q wave start or T wave end can lead to significant errors in the calculated QTc interval. These  
143 errors can potentially result in misdiagnosis or inaccurate risk stratification. To minimise this,  
144 automated computer algorithms are often used. However, these too can make errors, and manual  
145 checking by a trained individual remains the gold standard.

### 146 1.3.3 Drug-induced QTc Prolongation

147 Certain medications can interfere with the cardiac electrical activity by inhibiting specific ion  
148 channels involved in ventricular repolarisation, notably the hERG (human Ether-à-go-go-Related  
149 Gene) potassium channel. This channel blockade leads to a delay in the repolarization process,  
150 extending the duration of the QT interval, seen as QTc prolongation on an ECG. A prolonged QTc due  
151 to medications is of significant clinical concern, as it raises the risk of a severe form of ventricular  
152 tachycardia called Torsades de Pointes, which can be potentially life-threatening. This necessitates

153 careful QTc monitoring in patients on such medications<sup>14</sup>.  
154 However, the pharmacological impact of these drugs adds a layer of complexity when calculating the  
155 QTc interval. When a person is on QT-prolonging drugs, the measured QTc interval is not just a  
156 reflection of their inherent QTc but also encapsulates the drug's effect.  
157 Interpretation in such instances requires consideration of the drug's influence and timing.  
158 Understanding the pharmacokinetics of the drug, for instance, can assist in identifying when its effect  
159 on QTc is at its peak. In certain cases, under the supervision of a healthcare provider, it might be  
160 required to adjust or even momentarily stop the medication to ascertain an accurate measure of the  
161 individual's intrinsic QTc interval.

#### 162 1.3.4 Electrolyte Imbalances

163 Electrolytes, primarily potassium, calcium, and magnesium, play critical roles in the electrical  
164 activities of the heart, particularly in the processes of depolarisation and repolarisation. These ions  
165 move in and out of cardiac cells through specific channels, generating electrical signals that regulate  
166 the heartbeat. When there's an imbalance in the concentration of these electrolytes, the heart's  
167 normal electrical activity can be disrupted, leading to changes in the QT interval on the ECG<sup>15</sup>.

168 *Potassium:* This electrolyte plays a pivotal role in repolarisation, the phase represented by the QT  
169 interval. Low levels of potassium in the blood, or hypokalemia, can delay repolarisation, leading to  
170 prolongation of the QT interval. On the other hand, high potassium levels, or hyperkalemia, can  
171 shorten the QT interval.

172 *Calcium:* Calcium is involved in the depolarisation phase of the heart's electrical activity. High levels  
173 of calcium, or hypercalcemia, can shorten the QT interval, while low calcium levels, or hypocalcemia,  
174 are usually associated with a prolonged QT interval.

175 *Magnesium:* Magnesium acts as a natural calcium blocker and plays a critical role in maintaining  
176 potassium balance. Low levels of magnesium, or hypomagnesemia, can lead to both potassium loss  
177 and prolongation of the QT interval<sup>16</sup>.

178 In patients with electrolyte imbalances, measuring and interpreting the QTc interval can be

179 challenging due to these effects. It is crucial to consider the patient's electrolyte status, and in some  
180 cases, it may be necessary to correct the electrolyte imbalances before an accurate QTc  
181 measurement can be obtained. Additionally, long-term management should involve treating the  
182 underlying cause of the imbalance to prevent further cardiac complications.

### 183 1.3.5 Disease States

184 Underlying disease states can significantly impact the heart's electrical activity, including the QTc  
185 interval. These effects can stem from direct influences on the heart or indirect effects on the systems  
186 that regulate heart function.

187 *heart diseases:* Conditions such as coronary artery disease, congestive heart failure, and  
188 cardiomyopathies can affect the QTc interval. These diseases lead to structural and functional  
189 changes in the heart muscle that can alter the timing of ventricular repolarization, thereby affecting  
190 the QTc interval<sup>17</sup>. For instance, ischemic heart disease, resulting from reduced blood flow to the  
191 heart muscle, can prolong the QT interval.

192 *Liver diseases:* Advanced liver diseases, such as cirrhosis, can lead to QTc prolongation. The link  
193 between liver disease and QTc prolongation isn't fully understood, but it is thought to involve several  
194 factors, including autonomic dysfunction and alterations in cardiac ion channels due to cirrhosis.  
195 Liver disease can also affect electrolyte balance, further influencing the QTc interval<sup>18</sup>.

196 *Endocrine disorders:* Disorders of the endocrine system, particularly thyroid disorders, can affect the  
197 QTc interval. Hypothyroidism can cause a lengthening of the QTc interval due to decreased metabolic  
198 rate and associated changes in heart function. Conversely, hyperthyroidism can result in QTc  
199 shortening due to increased metabolism and heart rate, although QTc prolongation may also occur.

200 *Neurological disorders:* Certain neurological conditions, such as autonomic neuropathy, can also  
201 affect the QTc interval by altering the balance of the autonomic nervous system, which regulates  
202 heart rate and rhythm<sup>19</sup>.

203



204 **1.4 Conclusion**

205 In conclusion, this supplementary material has provided an extensive discussion on the plethora of  
206 challenges and complexities associated with defining the QTc interval in an ECG. The QTc interval's  
207 paramount role in risk stratification for developing arrhythmias underscores the urgency to address  
208 these problems. The quest for alternatives must prioritise not just their practicality and reliability but  
209 also their robust grounding in the underlying physiology.

210 The main paper ventures a proposition that QTp could serve as a more efficient and precise measure  
211 compared to the traditional QTc interval. As we continue to grapple with the challenges of QTc  
212 interval analysis and calculation, it is the diligent examination of such alternatives that will guide the  
213 path forward in our endeavour to enhance cardiovascular health assessments.

214 We believe this supplementary material serves as a detailed backdrop to the main paper, underlining  
215 the significance of the challenges in QTc analysis and calculation, and thus the potential impact of  
216 shifting to QTp as a measurement tool. We hope that the insights provided in this document offer a  
217 holistic understanding of the complexities involved and thus underscore the need for rigorous and  
218 continuous research in this area of cardiovascular health.

219

220

221

222

223

## 224 **Section 2: Evidence for the Simplified Egg and Changing Yolk Model**

### 225 **Usefulness in the Real-World Context**

#### 226 **2.1 Introduction**

227 This supplementary section uses ECG examples from the publicly available PTB-XL dataset<sup>20</sup> to  
228 provide proof as to the usefulness of the Simplified Egg and Changing Yolk Model in explaining  
229 the mechanism behind the various T wave (ventricular) repolarisation trace shapes.

230 Although the PTB-XL dataset itself contains 21,837 ECGs, this supplementary paper gives ECG  
231 examples demonstrating the various T wave configuration in lead V5 using the first 1000 ECGs  
232 (training group g1) of the dataset.

233 This section has been presented in three parts.

234 The **first part** demonstrates how the Simplified Egg and Changing Yolk model can be used to  
235 emulate the following T wave shapes:

236 Example 1. Normal T wave

237 Example 2. Higher (tenting) T wave

238 Example 3. Flat (pathology related) T wave

239 Example 4. Inverted T waves

240 Example 5. Biphasic T wave with initial positive deflection

241 Example 6. Biphasic T wave with initial negative deflection

242 Example 7. Bifid (camel hump shaped) T wave

243

244 The Simplified Egg and Changing Yolk model proposes that the ventricular repolarisation trace  
245 can be thought of as a signal propagating from the WCT, and the models explain how the ST  
246 segment is formed by symmetrical part of the egg shape, whilst the T wave is formed by the  
247 asymmetrical part.

248 Inevitably with a simplified model there are trade-offs to be made in terms of how closely the  
249 simulated T waves match the ECG ventricular repolarisation patterns. This we see especially in  
250 matching the Bifid T wave (and the ST depression followed by a negative or inverted T wave in the  
251 next part). The model can be improved in several ways however for clarity in explaining the  
252 concept of how T wave repolarisation shapes occur we have left the model in its simplified  
253 form.

254 The **second part** demonstrates how the Simplified Egg and Changing Yolk Model can be used to  
255 emulate:

256 Example 8. ST depression followed by positive T wave

257 Example 9. ST depression followed by biphasic T wave

258 Example 10. ST depression followed by inverted T wave

259 Example 11. ST elevation followed by positive T wave

260 Because of the asymmetrical nature of the 'egg' shape in the model, the Simplified Egg and  
261 Changing Yolk model predicts that it would be difficult to see ST elevation followed by specific  
262 configurations of T wave: biphasic and inverted. Thus, although we see 'ST depression' followed  
263 by T waves that are positive, biphasic or inverted, in 'ST elevation' we would only see ST  
264 elevation followed by a positive T wave. This is in keeping with what is seen in real world ECG  
265 examples providing further evidence of the usefulness of this model.

266 The **third part** demonstrates how the Simplified Egg and Changing Yolk model provides an  
267 explanation as to why 'normal' T waves on an ECG have a different appearance depending on

268 the heart rotation and orientation. In particular when the 'egg shape' from the lead V5 point of  
269 view appears to be:

270 Example 12. Asymmetrical – Normal T wave following a baseline ST segment

271 Example 13. Slightly asymmetrical – Normal T wave that start soon after QRS wave

272 Example 14. Symmetrical – Flat non-pathological T wave

273 We conclude that the simple but versatile Simplified Egg and Changing Yolk model is useful in  
274 understanding how the ventricular repolarisation pattern can lead to the various T wave traces  
275 on an ECG. This is done here by looking specifically at the direction of lead V5 but is applicable  
276 to the other ECG leads depending on the 'shape' of the heart they are seeing.

277 In the future we plan to further refine and develop this model to investigate the explanation for  
278 the U wave appearance, and also how different types of hypertrophy and coronary artery  
279 territory damage affects the shape of the subsequent repolarising T wave.

280

281

282 **2.2 Part 1: Variations of the T Wave Shapes**

283 In Examples 1 to 7 below we describe how the Simplified Egg and Changing Yolk model can be  
284 used to describe the 'normal' T wave shape, and many of the common variations of T wave  
285 shapes due to pathological causes.

286 Real world ECG examples from the PTB-XL dataset are given alongside each T wave morphology  
287 example.

288 These examples can be explored in more detail using our software simulation tool available at:

289 <https://t-wave.aber.ac.uk/>

290

### Example 1. Normal T Wave

ECG ID: training/ptb-xl/g1/HR00029

ECG Diagnosis Given: sinus rhythm normal ecg.

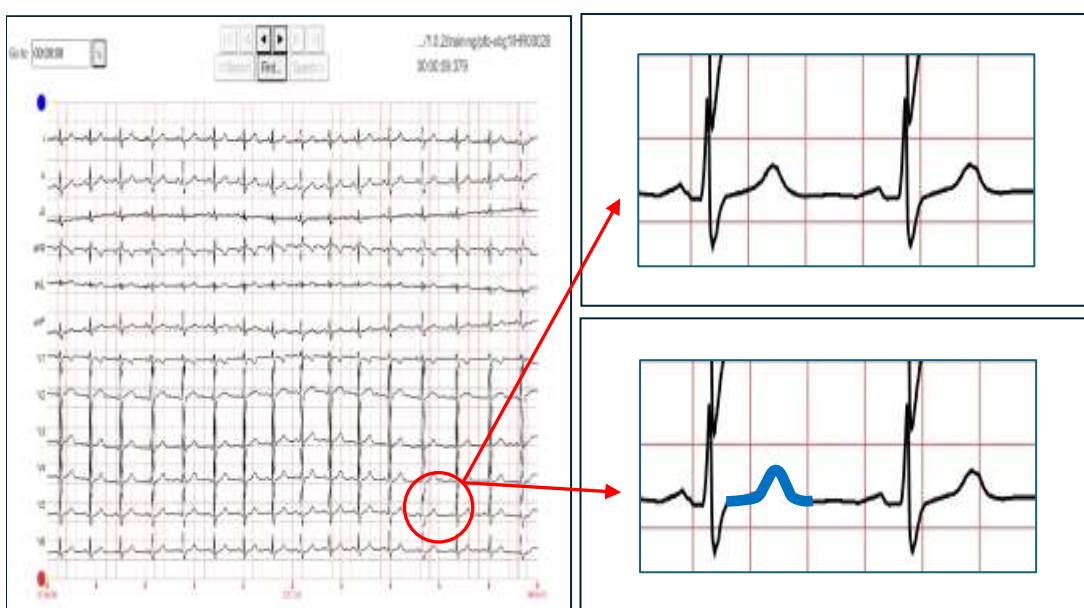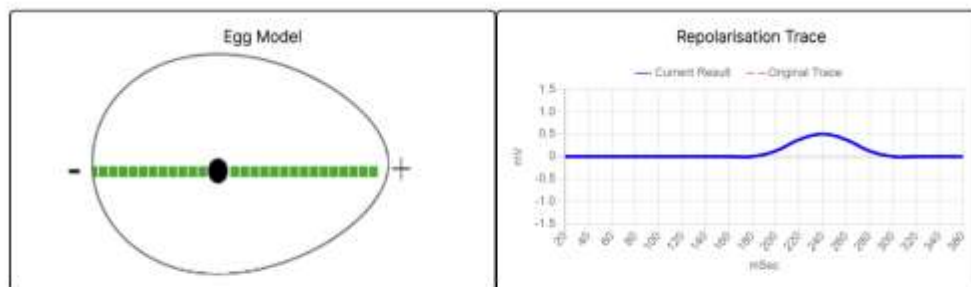

Settings

Basal Hypertrophy:  Instructions

Apical Hypertrophy:  Select either "Custom" or "Presets" value Presets

Damage Severity:  Custom

Run, Pause or Continue the simulation

**Commentary:** This is typical example of a normal repolarisation trace in lead V5. The ST segment of the simulated trace is generated by the symmetrical part of the egg shape, and the T wave is generated when the signal propagates into the asymmetrical part.

**Other Similar Example Cases:** training/ptb-xl/g1/HR00054, HR00120, HR00198, HR00322, HR00488, HR00507, HR00644, HR00726, HR00824, HR00949

## Example 2. Higher T Wave (Tented Shape)

ECG ID: training/ptb-xl/g1/HR00521

ECG Diagnosis Given: sinus rhythm. non-specific increased st-t changes otherwise normal ecg.

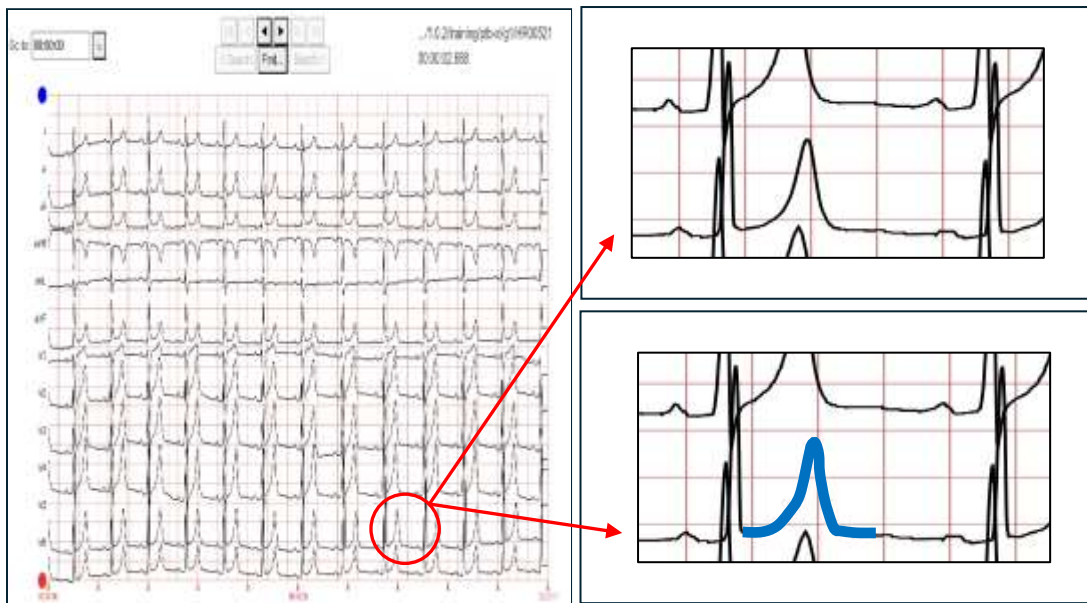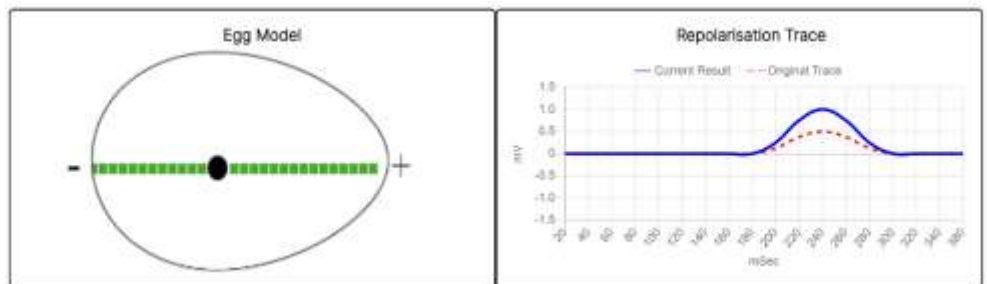

Settings

Basal Hypertrophy:

Apical Hypertrophy:  Select either "Custom" or "Presets" value Presets

Damage Severity:

Run, Pause or Continue the simulation

**Commentary:** This is an example of a prominent T wave repolarisation trace in lead V5. Tall T waves can appear in acute coronary ischaemia / infarction, pericarditis, or hyperkalaemia. They can also be present in some adults and athletes.

**Other Similar Example Cases:** training/ptb-xl/g1/HR00306, HR00682, HR00718, HR00821, HR00974

### Example 3. Flat T Wave (Pathological)

ECG ID: training/ptb-xl/g1/HR00476

**ECG Diagnosis Given:** sinus rhythm. st segments are depressed in i, ii, avl, v5,6. t waves are low or flat in limb leads and v4,5,6. this may be due to lv strain or ischaemia.

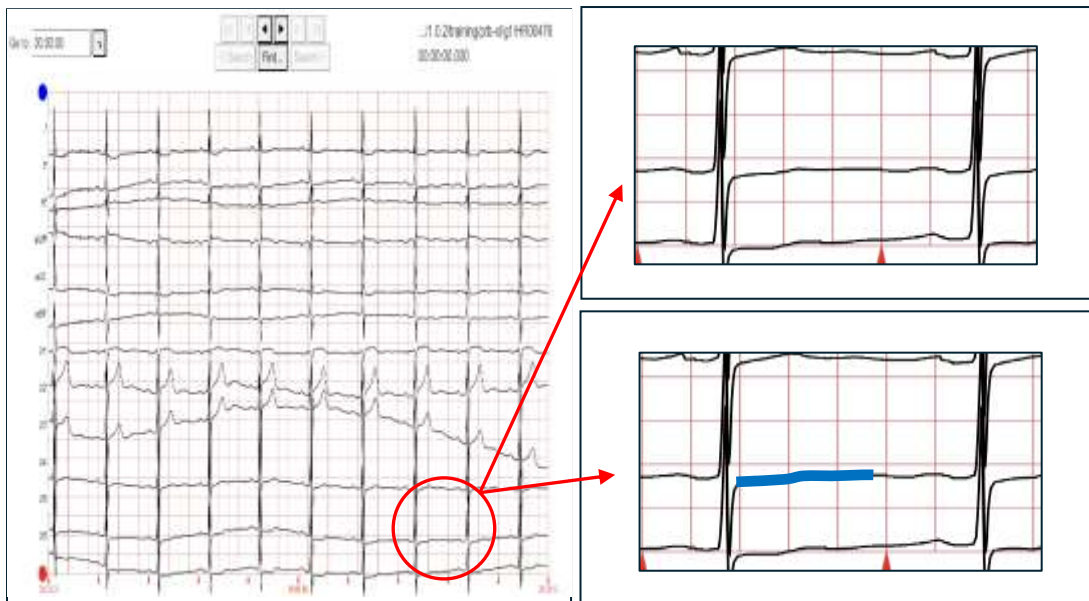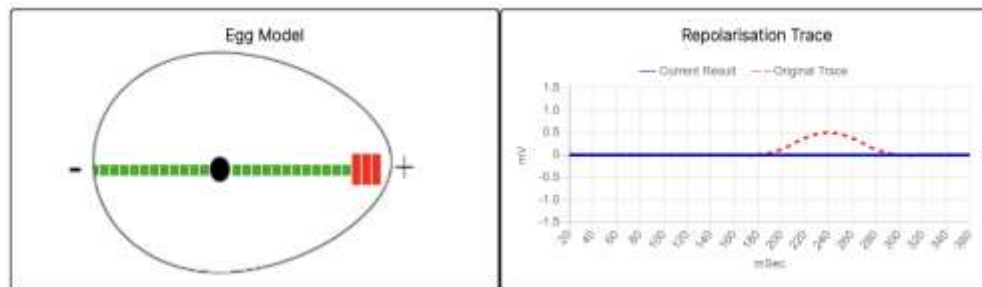

**Settings**

Basal Hypertrophy:

Apical Hypertrophy:

Damage Severity:

Select either "Custom" or "Presets" value: Presets:

Run, Pause or Continue the simulation:

**Commentary:** This is an example of a flat repolarisation trace in lead V5 usually due to pathological causes such as anteroseptal or inferior myocardial infarction/ischaemia, or hypokalaemia.

**Other Similar Example Cases:** training/ptb-xl/g1/HR00069, HR00217, HR00305, HR00495, HR00496, HR00529, HR00535, HR00557, HR00612, HR00692



### Example 4. Inverted T Wave

ECG ID: training/ptb-xl/g1/HR00271

**ECG Diagnosis Given:** premature atrial contraction(s). sinus rhythm. left atrial enlargement. qs complexes in v2 and tiny r waves in v3. st segments are depressed and t waves inverted in i, avl, v5, v6 consistent with ischaemic heart disease with old anteroseptal myocardial.

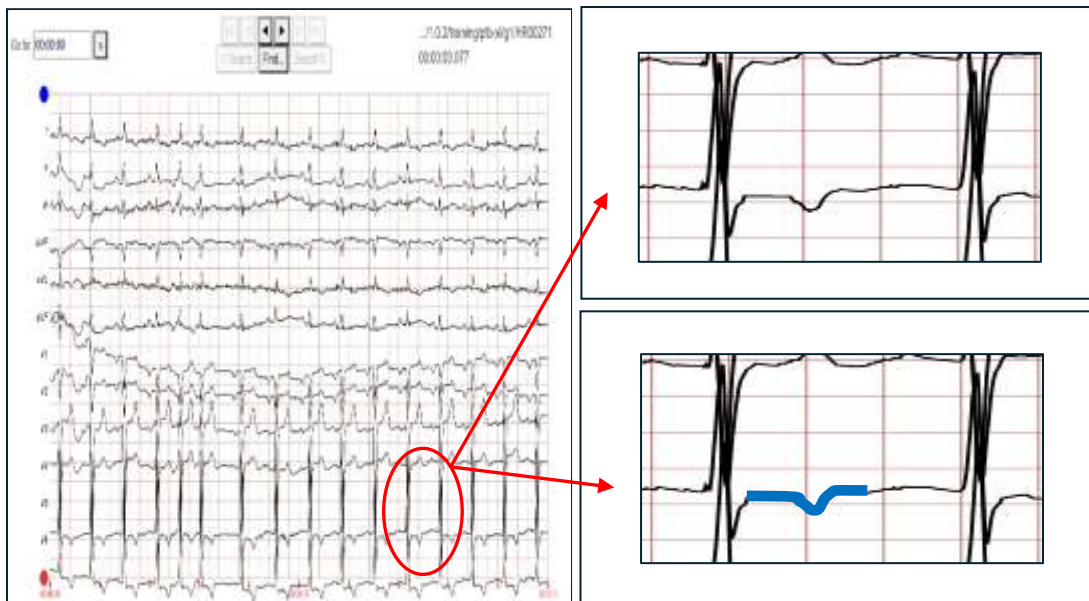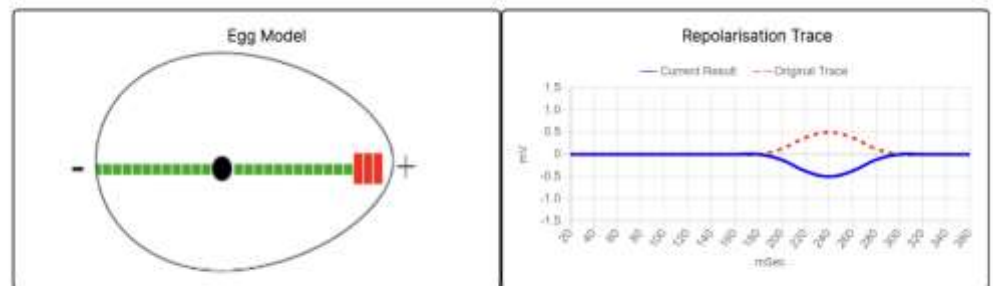

Settings

Basal Hypertrophy:

Apical Hypertrophy:

Damage Severity:

Select either "Custom" or "Presets" value: Presets:

Run, Pause or Continue the simulation

**Commentary:** This is an example of an inverted repolarisation trace in lead V5, usually seen in anteroseptal infarction/ischaemia, bundle branch block, or left ventricular hypertrophy.

**Other Similar Example Cases:** training/ptb-xl/g1/HR00274, HR00281, HR00414, HR00468, HR00564, HR00704, HR00765, HR00914, HR00997

### Example 5. Biphasic T Wave (With Initial Positive Deflection)

ECG ID: training/ptb-xl/g1/HR00209

**ECG Diagnosis Given:** sinus rhythm, av block, intraventricular performance disturbance in v1 with steep t wave that changes to negative in v4 v5, pathological ecg.

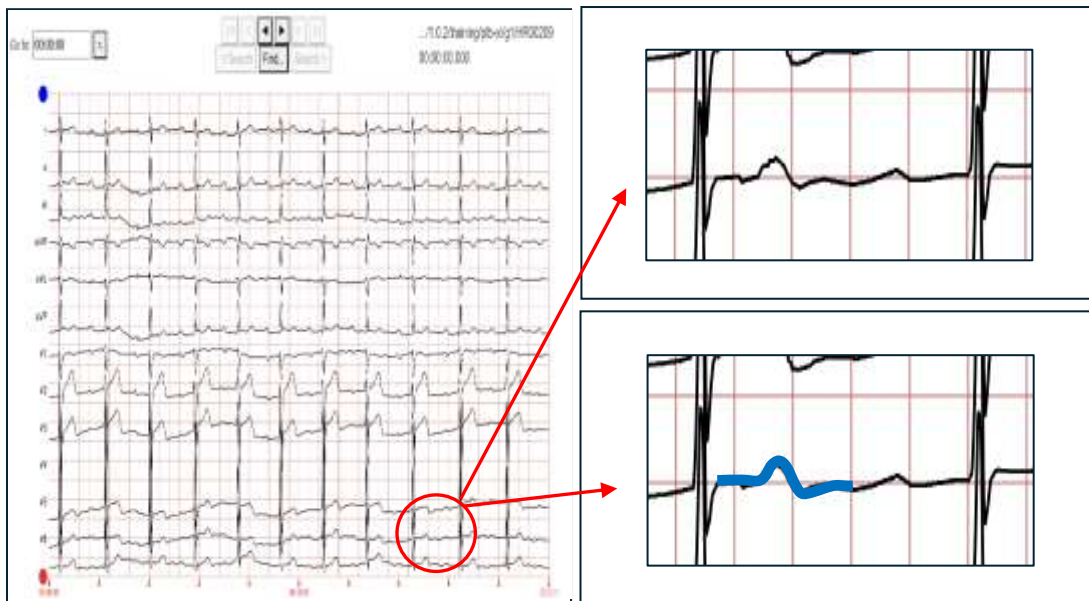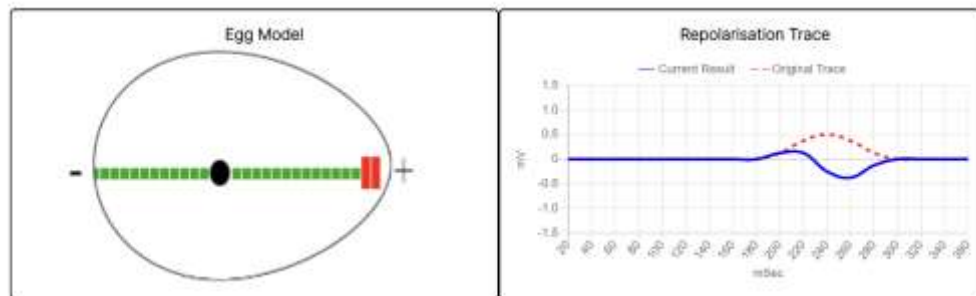

**Settings**

Basal Hypertrophy:

Apical Hypertrophy:

Damage Severity:

Select either "Custom" or "Presets" value: Presets:

Run, Pause or Continue the simulation

**Commentary:** This is an example of a biphasic repolarisation trace in lead V5 with an initial positive deflection. Usually found in myocardial infarction / ischaemia.

**Other Similar Example Cases:** training/ptb-xl/g1/HR00177, HR00693, HR00898

### Example 6. Biphasic T Wave (With Initial Negative Deflection)

ECG ID: training/ptb-xl/g1/HR00519

**ECG Diagnosis Given:** sinus rhythm extreme left electrical axis left anterior hemiblock st-t lowering, as in inferolateral ischemia or left loading.

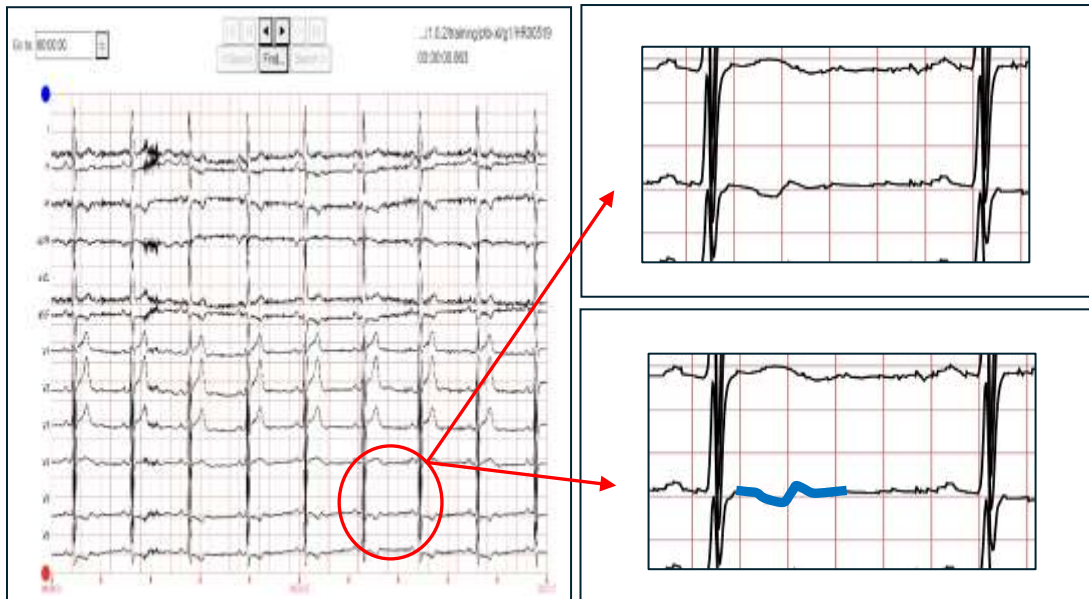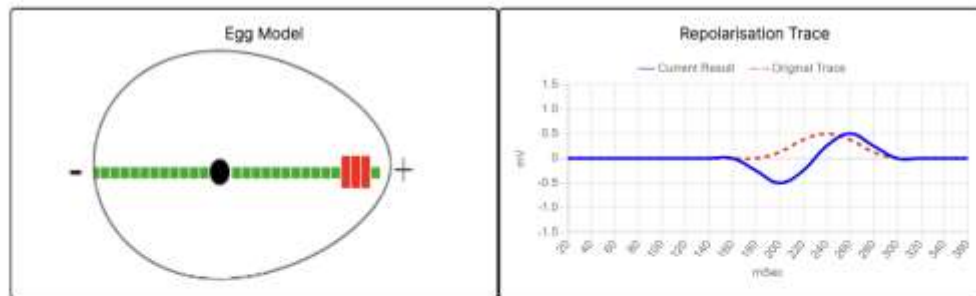

**Settings**

Basal Hypertrophy:

Apical Hypertrophy:

Damage Severity:

Select either "Custom" or "Presets" value: Presets

Run, Pause or Continue the simulation

**Commentary:** This is an example of a biphasic repolarisation trace in lead V5 with an initial negative deflection. Usually found in myocardial infarction/ischaemia, or hypokalaemia.

**Other Similar Example Cases:** training/ptb-xl/g1/HR00039, HR00310, HR00530, HR00530, HR00923, HR00941

### Example 7. Bifid T Wave (Camel Hump Shaped)

ECG ID: training/ptb-xl/g1/HR00512

ECG Diagnosis Given: sinus bradycardia difficult to determine electrical axis, right-sided leg block.

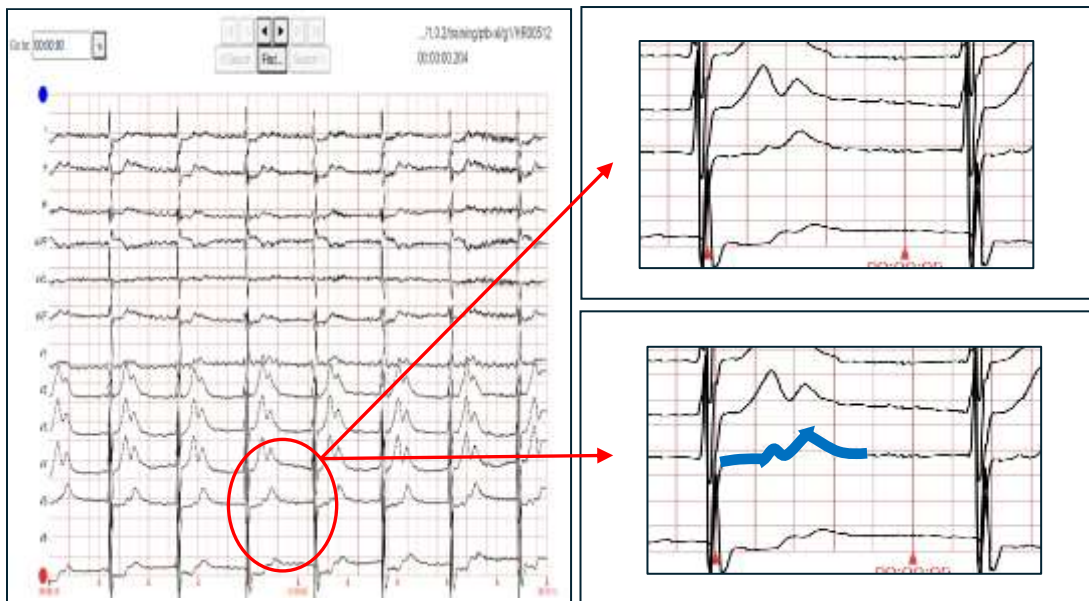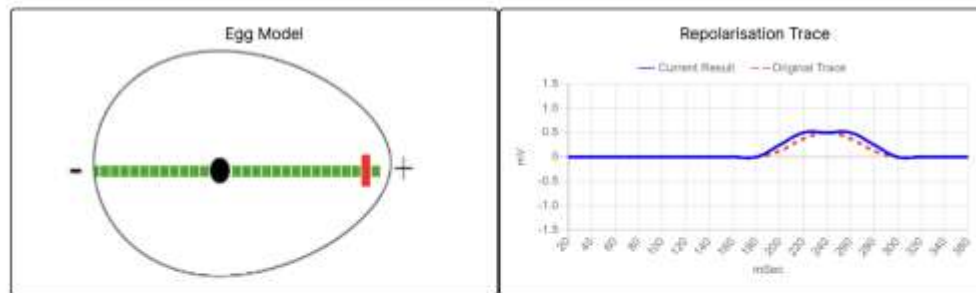

**Settings**

Basal Hypertrophy:   
Apical Hypertrophy:   
Damage Severity:

Select either "Custom" or "Presets" value: Presets   
Run, Pause or Continue the simulation

**Commentary:** This is an example of a bifid (camel hump) repolarisation trace in lead V5. They are not common, but can also be seen with fusion of T wave with a prominent U wave or P wave. (The simulated result here can be improved by adding more features as discussed in the conclusion section.)

**Other Similar Example Cases:** training/ptb-xl/g1/HR00458

298 **2.3 Part 2. ST Depression and ST Elevation Examples**

299 The Simplified Egg and Changing Yolk model has a symmetrical element and an asymmetrical  
300 element as described in the main paper as the 'T zone'.

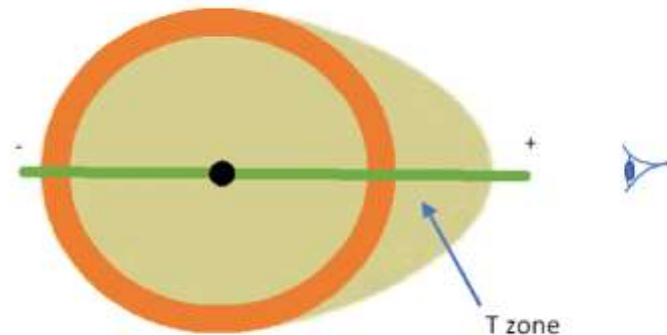

301

302

303 *Figure 1. Representation of the heart in the Simplified Egg and Changing Yolk Model. This figure*  
304 *illustrates a simplified representation of the heart as an egg-shaped 3D object, with the WCT*  
305 *designated at its centre. The green line denotes the vector of lead V5, which, in this instance,*  
306 *passes through the long axis of the egg shape. Signals detected to the right of the WCT for lead*  
307 *V5 register as positive signals, while those on the left side will register as negative signals. The*  
308 *resulting ECG trace generated by the lead is the net result of these positive and negative signals*  
309 *over time. The ST segment of the ventricular repolarisation trace occurs as the signal is*  
310 *expanding out from the WCT over the symmetrical area, whilst the T wave deflection occurs*  
311 *when the repolarisation signal has expanded out into the T zone area.*

312 The model hypothesizes that the T wave is formed by the asymmetrical part (T zone) which from  
313 lead V5 point of view is towards the apex of the heart (egg shape). Since the T wave is 'created'  
314 by repolarisation in the T zone, it suggests that T wave shapes can be determined by damage or

315 impaired repolarisation in the heart muscle in the T zone. In this manner we are able to  
316 construct the T wave shapes of 'flat, biphasic and inverted' T waves. Thus ischaemia or infarct  
317 towards the apex of the heart can result in those 'abnormal' T wave shapes. Examples 8 to 10  
318 are given to demonstrate the T waves shapes where there is ischaemia (impaired repolarisation)  
319 in the lateral part of the heart causing ST depression and altered T wave shapes.

320 However, the Simplified Egg and Changing Yolk model also suggest that 'damage' to the basal  
321 part of the heart (distal areas of lead V5 vector), would result in ST elevation (positive  
322 deflection), and will not be able to alter the T wave shapes since the T zone is not affected.  
323 Hence the model suggest that we would only be able to see ST elevation followed by a positive T  
324 wave (see Example 11 below). According to the model it would be difficult to see ST elevation  
325 followed by an inverted T wave, or ST elevation followed by biphasic T wave. Indeed in the 1000  
326 ECGs reviewed in this dataset we were unable to find any examples of these.

327 This is further evidence of the usefulness of the Simplified Egg and Changing Yolk model in  
328 predicting how ventricular repolarising traces will appear, as well as a concept for  
329 understanding T wave repolarisation shapes.

### Example 8. ST Depression With A Positive T Wave

ECG ID: training/ptb-xl/g1/HR00259

**ECG Diagnosis Given:** sinus rhythm. st segment depression in inferolateral leads suggests ischaemia or left ventricular strain.

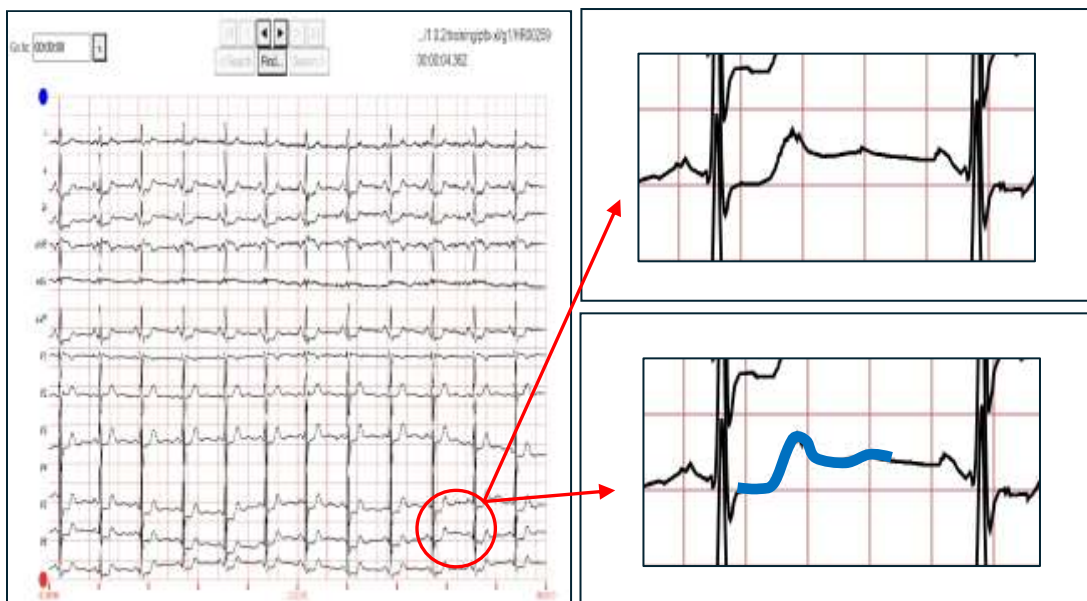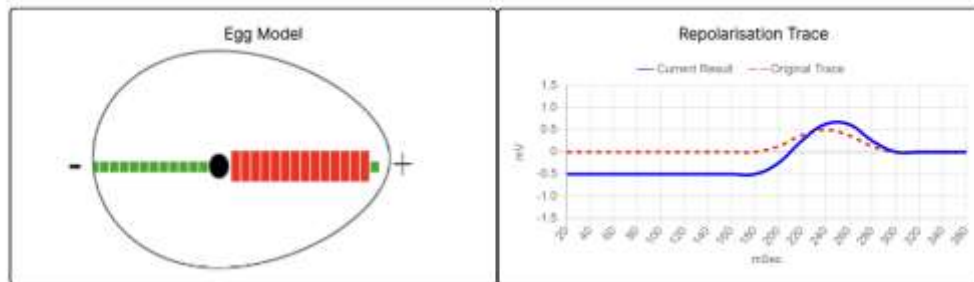

**Settings**

Basal Hypertrophy:

Apical Hypertrophy:

Damage Severity:

Select either "Custom" or "Presets" value: Presets:

Run, Pause or Continue the simulation:

**Commentary:** This is an example of a normal T wave following ST depression in lead V5. These are associated with myocardial lateral ischaemia.

**Other Similar Example Cases:** training/ptb-xl/g1/HR00164, HR00211, HR00223, HR00325, HR00380, HR00425, HR00485, HR00501, HR00513, HR00743

### Example 9. ST Depression With A Biphasic T Wave

ECG ID: training/ptb-xl/g1/HR00767

**ECG Diagnosis Given:** sinus rhythm. left atrial enlargement. voltages are high in chest leads suggesting lvh. st segments are depressed and t waves inverted in i, ii, avl, v2-6. this may be due to lv strain or ischaemia.

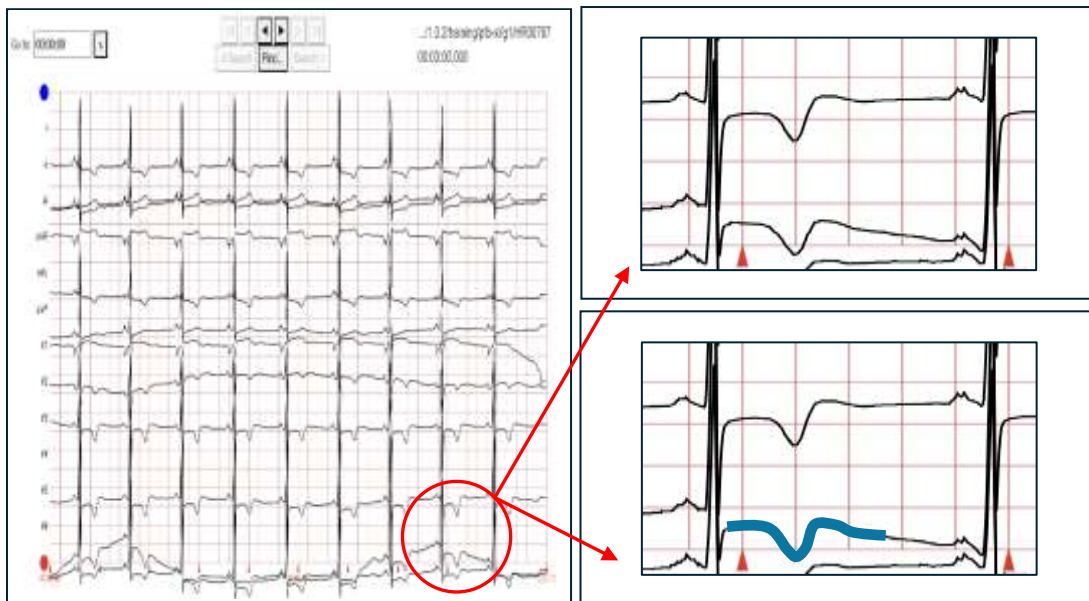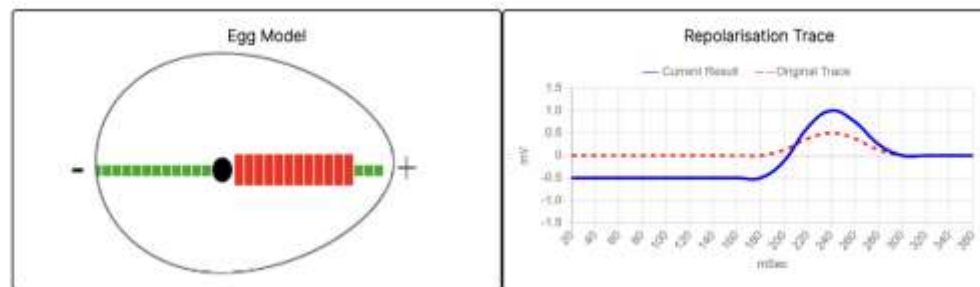

**Settings**

Basal Hypertrophy:

Apical Hypertrophy:

Damage Severity:

Select either "Custom" or "Presets" value: Presets

Run, Pause or Continue the simulation

**Commentary:** This is an example of a biphasic T wave following ST depression in lead V5. (The simulated result here can be improved by adding more features to the model as discussed in the conclusion section.)

**Other Similar Example Cases:** training/ptb-xl/g1/HR00282, HR00299, HR00383, HR00423, HR00429, HR00525, HR00545, HR00634, HR00820, HR00934



### Example 10. ST Depression With An Inverted T Wave

ECG ID: training/ptb-xl/g1/HR00510

**ECG Diagnosis Given:** sinus rhythm. prolonged pr interval. possible old inferior infarct. sinus bradycardia extreme left electrical axis left anterior hemiblock. st-t decrease, as in anterolateral ischemia or left load t-f-change, as in inferolateral myocardial affection.

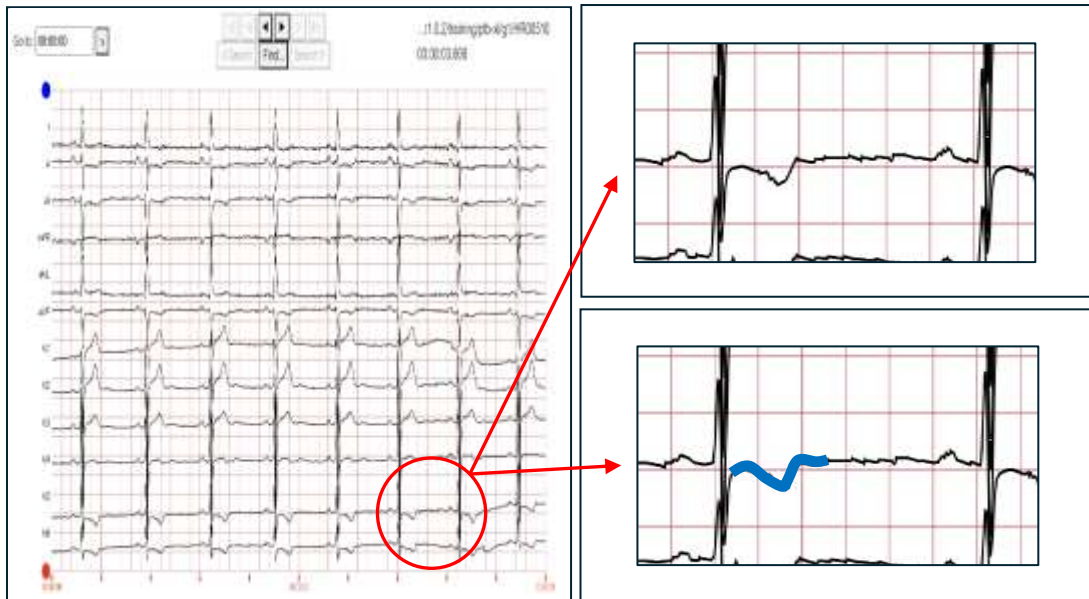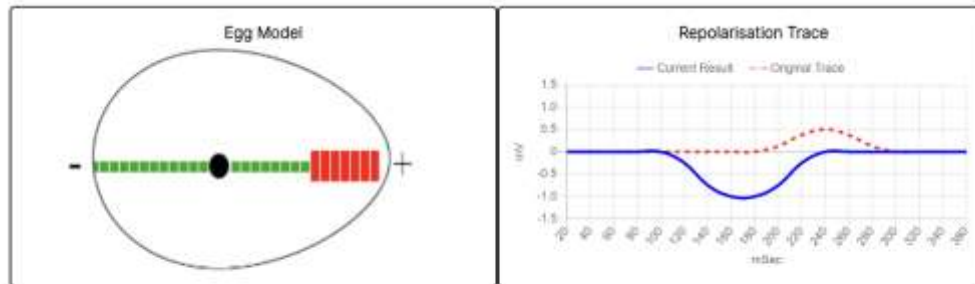

**Settings**

Basal Hypertrophy:

Apical Hypertrophy:

Damage Severity:

[Instructions](#)

Select either "Custom" or "Presets" value Presets:

Run, Pause or Continue the simulation

[Run Simulation](#)

**Commentary:** This is an example of an inverted T wave following ST depression in lead V5. (The simulated result here can be improved by adding more features to the model as discussed in the conclusion section.)

**Other Similar Example Cases:** training/ptb-xl/g1/HR00296, HR00414, HR00461, HR00541, HR00551, HR00585, HR00699, HR00768, HR00828, HR00914

### Example 11. ST Elevation With A Positive T Wave

ECG ID: training/ptb-xl/g1/HR00257

**ECG Diagnosis Given:** premature atrial contraction(s). sinus rhythm. left atrial enlargement. qs complexes in v2. st segments are slightly elevated in v2,3. st segments are depressed in i, avl. t waves are low or flat in i, v5,6 and inverted in avl. consistent with ischaemic heart.

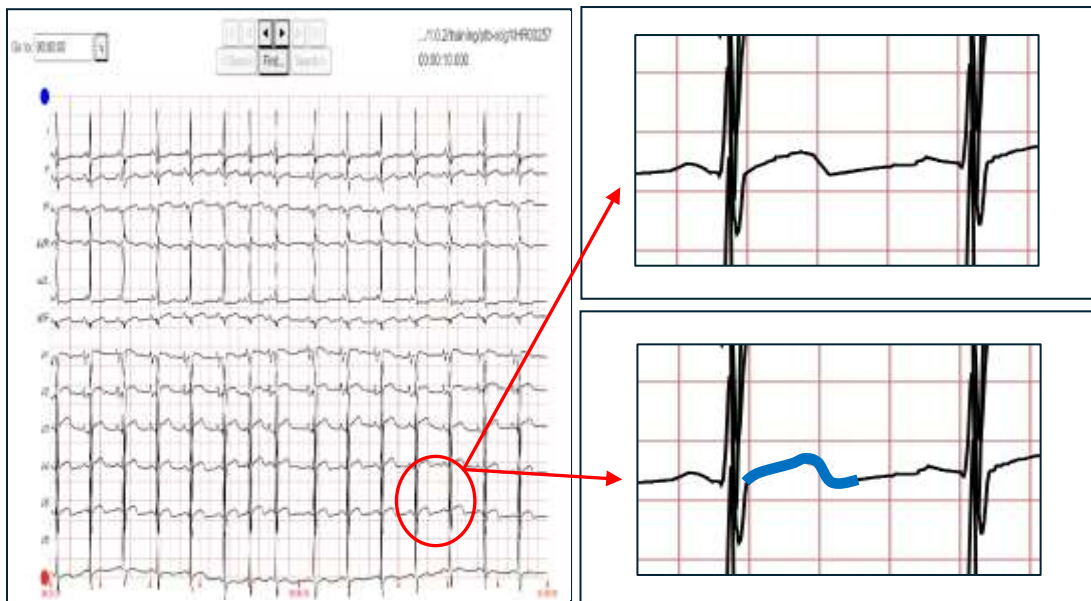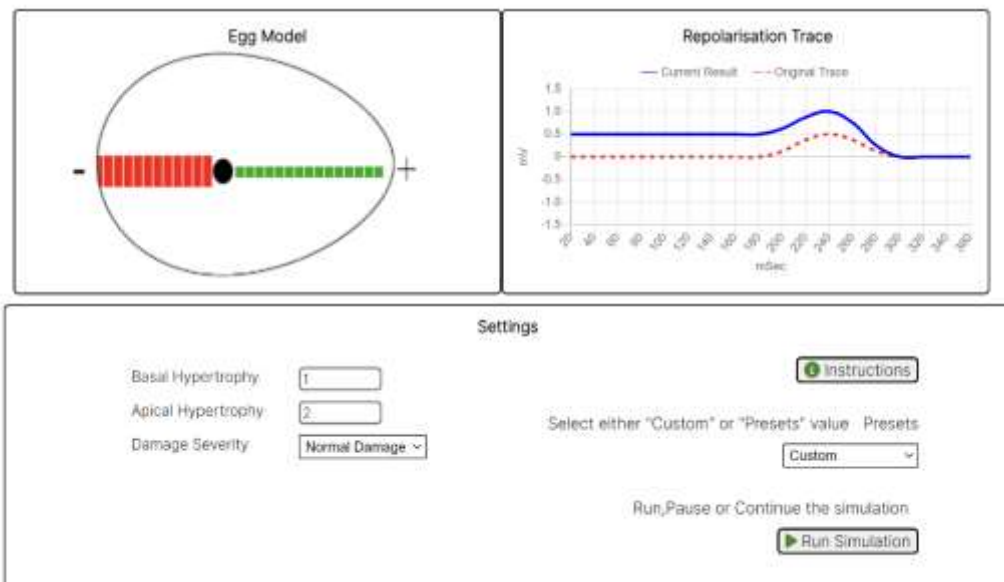

**Commentary:** This is an example of a normal repolarisation trace following ST elevation in lead V5. The model predicts that ST elevation followed by a biphasic or inverted T wave would be difficult to see (unless there is extensive ischaemia / infarction affecting both the basal and lateral aspects of the heart).

**Other Similar Example Cases:** training/ptb-xl/g1/HR00181, HR00184, HR00827, HR00920, HR00947

334 **2.4 Part 3. Egg Shape / Heart Orientation Effect on the T Wave**

335 The Simplified Egg and Changing Yolk model has a symmetrical element which defines the ST  
336 segment as above, and an asymmetrical element which defines the T wave shape. If however  
337 the heart shape is changed so that from lead V5 point of view the egg 'shape' becomes less  
338 symmetrical (spherical) with a larger asymmetrical (T zone) element. The effect of this predicted  
339 by the Simplified Egg and Changing Yolk model is that the ST segment duration is reduced, and  
340 the T wave is seen to start earlier after the QRS complex (See Example 13).

341 If the heart is rotated around the y axis, then from lead V5 point of view the egg 'shape' becomes  
342 more symmetrical with a smaller asymmetrical (T zone) element. If the heart is rotated further,  
343 the asymmetrical element disappears and from lead V5 point of view as the heart 'egg' shape  
344 becomes spherical. This has the result of producing a flat (or absent) T wave (See Example 14).

345 Please note that in the Examples 13 and 14 the ECGs are both 'normal', and the different T  
346 waves shapes in lead V5 are not from pathological causes.

## Example 12. Normal T Wave With An Asymmetrical 'Egg' Shape

ECG ID: training/ptb-xl/g1/HR00014

ECG Diagnosis Given: sinus rhythm. normal ecg.

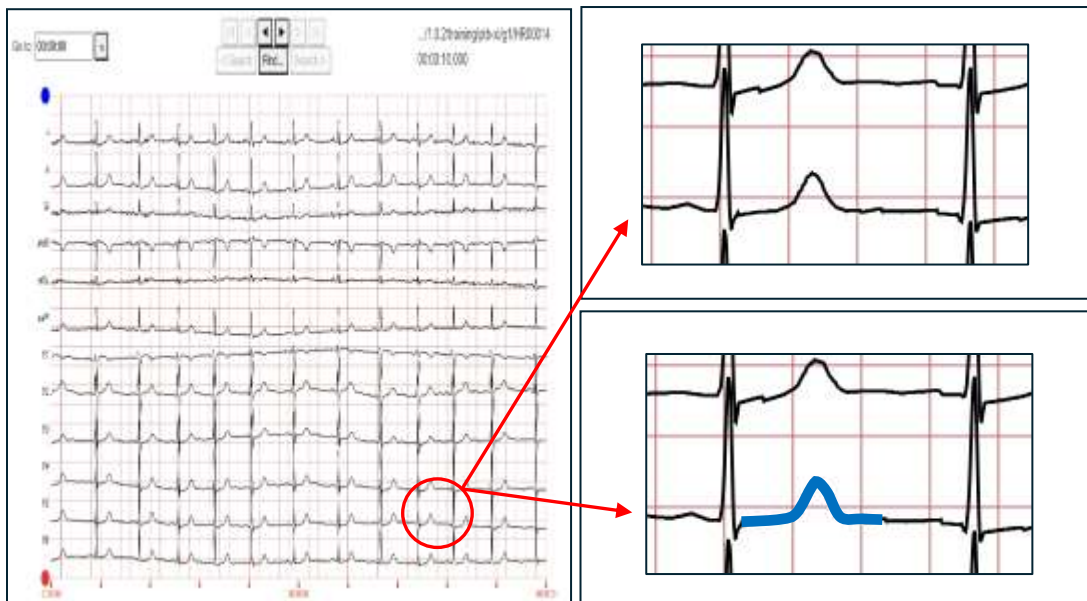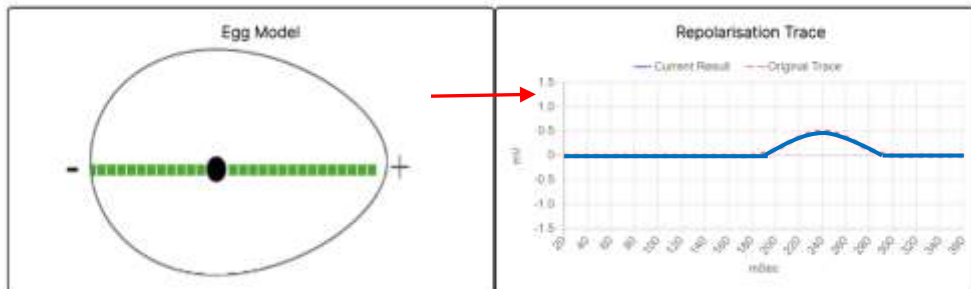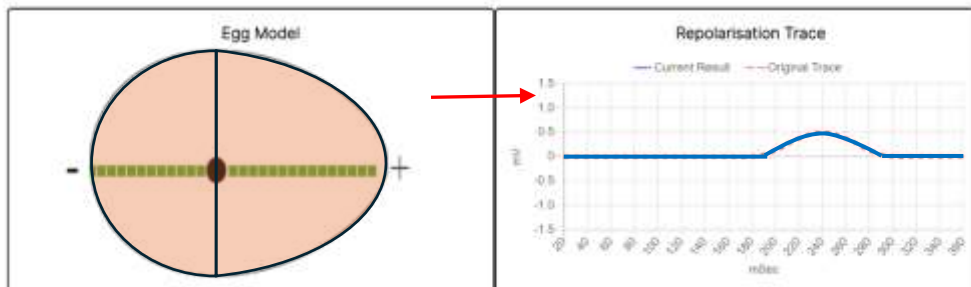

**Commentary:** This is an example of a normal repolarisation trace in lead V5 to demonstrate examples where the T wave deflection starts a short while after the QRS complex. The normal ST segment is flat and represents the 'symmetrical' element of the egg shape. The asymmetrical part generates the T wave.

**Other Similar Example Cases:** training/ptb-xl/g1/HR00005, HR00010, HR00021, HR00037, HR00055, HR00056, HR00066, HR00070, HR00081, HR00082

### Example 13. Normal T Wave With Less Asymmetrical 'Egg' Shape

ECG ID: training/ptb-xl/g1/HR00009

ECG Diagnosis Given: sinus rhythm. normal ecg.

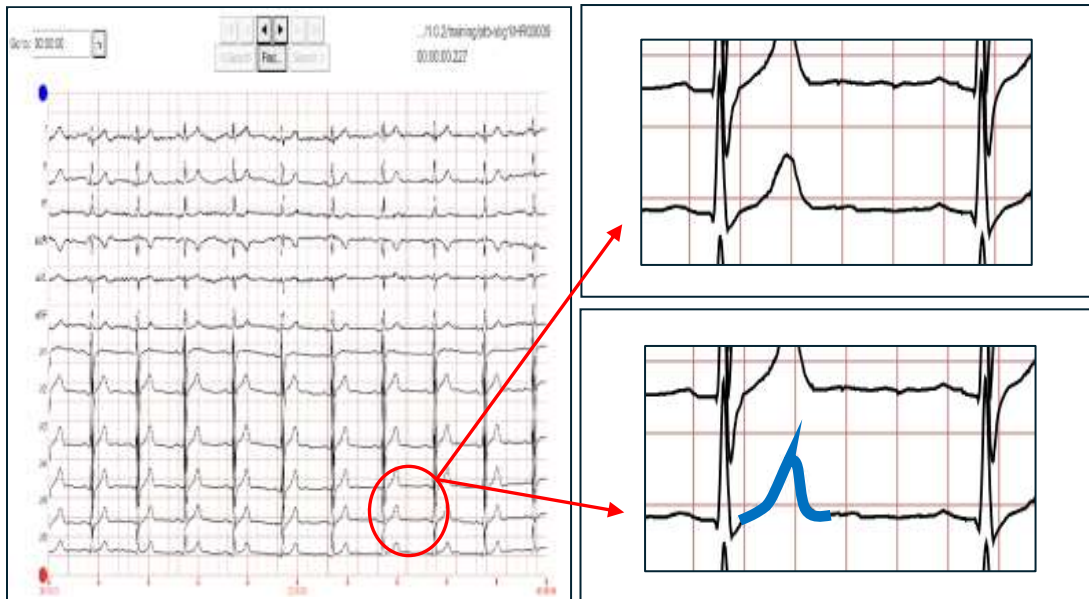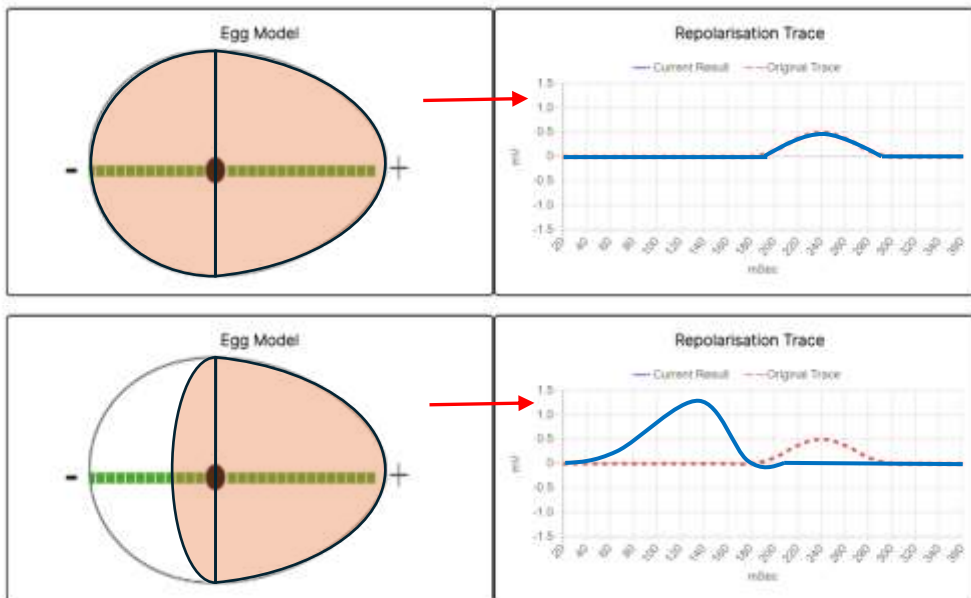

**Commentary:** This is an example of a normal repolarisation trace in lead V5 to demonstrate examples where the T wave deflection starts soon after the QRS complex. The normal ST segment is shortened (or absent) due to the asymmetry.

**Other Similar Example Cases:** training/ptb-xl/g1/HR00002, HR00004, HR00016, HR00035, HR00046, HR00057, HR00075, HR00079, HR00088, HR00095

### Example 14. Flat T Wave Non-Pathological (Symmetrical 'Egg' Shape)

ECG ID: training/ptb-xl/g1/HR00134

ECG Diagnosis Given: sinus rhythm left electrical axis no definite pathology

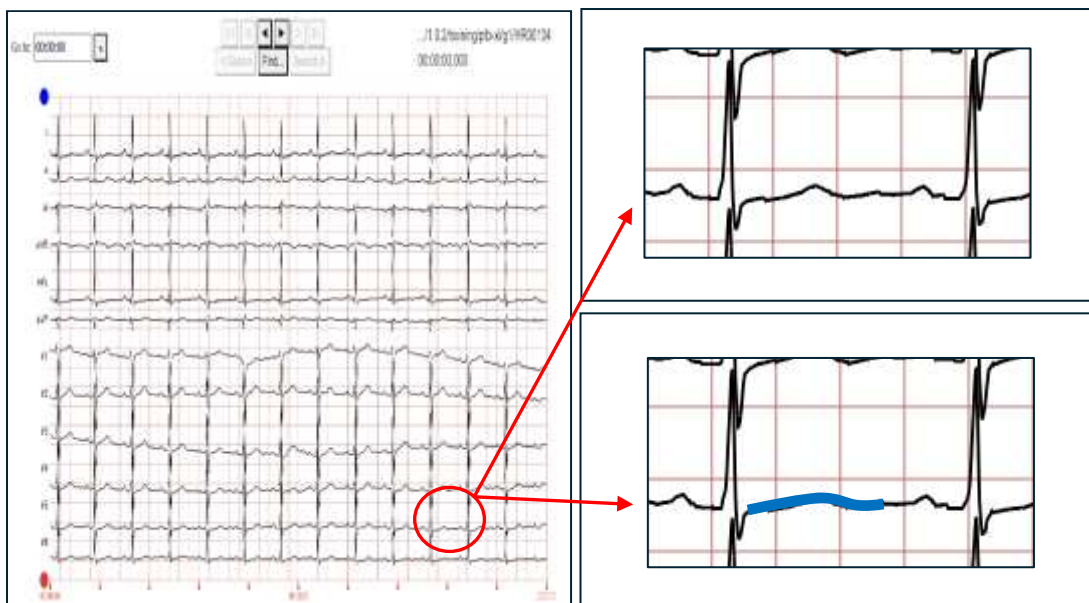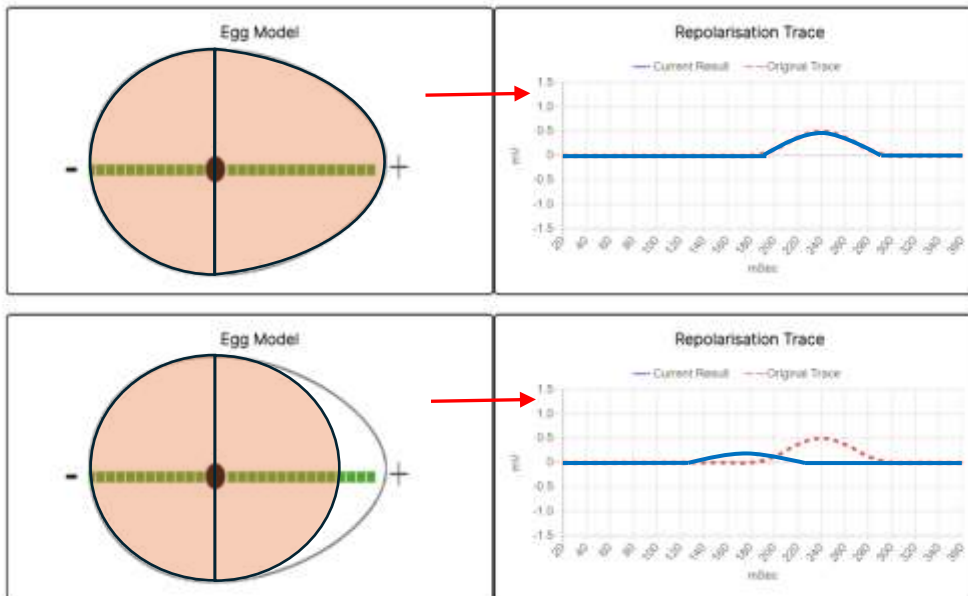

**Commentary:** This is an example of a normal repolarisation trace which has a relatively flat T wave (or absent) in lead V5 due to the orientation of the heart. The resulting shape is symmetrical and so the T wave appears diminished.

**Other Similar Example Cases:** training/ptb-xl/g1/HR00306, HR00682, HR00718, HR00821, HR00974

## 350 **2.5 Conclusion**

351 In this supplementary paper we have demonstrated how the Simplified Egg and Changing Yolk  
352 model can be used to describe the normal and pathological T wave patterns that are commonly  
353 seen in ECGs. This simple but versatile model is useful in increasing our understanding how the  
354 ventricular repolarisation pattern can lead to the various T wave traces on an ECG.

355 We further proved the usefulness of the Simplified Egg and Changing Yolk model in its ability to  
356 predict that inverted and biphasic T wave shapes can be seen in ST depression (impaired  
357 repolarisation towards the apex of the heart), but would be difficult to see in ST elevation where  
358 the ischaemia is towards the base (right side) of the heart. This is demonstrated by real world  
359 the examples from the PTB-XL dataset.

360 Finally, we have shown how the Simplified Egg and Changing Yolk model can be used to  
361 understand how the variations in normal (non-pathological) T waves can be explained. This  
362 includes ECGs where the ventricular repolarisation trace in lead V5 has no ST segment, or  
363 where the T waves are nearly flat. Although in this model we are looking specifically at lead V5,  
364 the principles are applicable to the other ECG leads depending on the 'shape' of the heart they  
365 are seeing.

366 Inevitably with a simplified model such as this there are trade-offs to be made in terms of how  
367 closely the simulated T waves match the ECG ventricular repolarisation patterns. This we see  
368 especially in matching the bifid T wave, and the ST depression followed by a negative or inverted  
369 T wave in the simulation. This matching can be improved by increasing the number of blocks  
370 and severity of damage levels in this model, however the model presented here is at the  
371 'simplified' level in order to explain the principles in an understandable manner.

372 Having demonstrated the usefulness of this model, in the future we are planning to develop the  
373 model further to provide an explanation for the U wave, and to refine the model to include the  
374 effects of hypertrophy and coronary artery occlusion in defined territories of the model.

375

376



377 **References**

- 378 1. Baumert M, Porta A, Vos MA, et al.: QT interval variability in body surface ECG:  
379 measurement, physiological basis, and clinical value: position statement and consensus  
380 guidance endorsed by the European Heart Rhythm Association jointly with the ESC Working  
381 Group on Cardiac Cellular Electrophysiology. *Europace* 2016; 18:925–944.
- 382 2. Cox AJ, Azeem A, Yeboah J, et al.: Heart Rate–Corrected QT Interval Is an  
383 Independent Predictor of All-Cause and Cardiovascular Mortality in Individuals With Type 2  
384 Diabetes: The Diabetes Heart Study. *Diabetes Care* 2014; 37:1454–1461.
- 385 3. Portaluppi F, Hermida RC: Circadian rhythms in cardiac arrhythmias and  
386 opportunities for their chronotherapy. *Advanced Drug Delivery Reviews* 2007; 59:940–951.
- 387 4. Sztajzel J: Heart rate variability: a noninvasive electrocardiographic method to  
388 measure the autonomic nervous system. *Swiss Med Wkly [Internet]* 2004 [cited 2024 Dec  
389 11]; . Available from: <https://smw.ch/index.php/smw/article/view/411>
- 390 5. Chiladakis J, Kalogeropoulos A, Arvanitis P, Koutsogiannis N, Zagli F, Alexopoulos D:  
391 Heart Rate-Dependence of QTc Intervals Assessed by Different Correction Methods in  
392 Patients with Normal or Prolonged Repolarization: HEART RATE-DEPENDENCE OF QTc  
393 INTERVALS. *Pacing and Clinical Electrophysiology* 2009; 33:553–560.
- 394 6. Rautaharju PM, Surawicz B, Gettes LS: AHA/ACCF/HRS Recommendations for the  
395 Standardization and Interpretation of the Electrocardiogram. *Journal of the American  
396 College of Cardiology* 2009; 53:982–991.
- 397 7. Antzelevitch C: Transmural dispersion of repolarization and the T wave.  
398 *Cardiovascular Research* 2001; 50:426–431.

- 399 8. Yan G-X, Antzelevitch C: Cellular Basis for the Normal T Wave and the  
400 Electrocardiographic Manifestations of the Long-QT Syndrome. *Circulation* 1998; 98:1928–  
401 1936.
- 402 9. Postema P, Wilde A: The Measurement of the QT Interval. *CCR* 2014; 10:287–294.
- 403 10. Drew BJ, Califf RM, Funk M, et al.: Practice Standards for Electrocardiographic  
404 Monitoring in Hospital Settings: An American Heart Association Scientific Statement From  
405 the Councils on Cardiovascular Nursing, Clinical Cardiology, and Cardiovascular Disease in  
406 the Young: Endorsed by the International Society of Computerized Electrocardiology and the  
407 American Association of Critical-Care Nurses. *Circulation* 2004; 110:2721–2746.
- 408 11. Goldenberg I, Moss AJ, Zareba W: QT Interval: How to Measure It and What Is  
409 “Normal.” *Cardiovasc electrophysiol* 2006; 17:333–336.
- 410 12. De Oliveira Neto NR, De Oliveira WS, Campos Pinto GD, De Oliveira ESR, Da Silveira  
411 Barros M das ND: A Practical Method for QTc Interval Measurement. *Cureus* 2020;  
412 12:e12122.
- 413 13. Vandenberg B, Vandael E, Robyns T, et al.: Which QT Correction Formulae to Use for  
414 QT Monitoring? *JAHA* 2016; 5:e003264.
- 415 14. Al-Khatib SM, LaPointe NMA, Kramer JM, Califf RM: What Clinicians Should Know  
416 About the QT Interval. *JAMA [Internet]* 2003 [cited 2024 Dec 10]; 289. Available from:  
417 <http://jama.jamanetwork.com/article.aspx?doi=10.1001/jama.289.16.2120>
- 418 15. El-Sherif N, Turitto G: Electrolyte disorders and arrhythmogenesis. *Cardiol J* 2011;  
419 18:233–245.

- 420 16. Whang R, Whang DD, Ryan MP: Refractory Potassium Repletion: A Consequence of  
421 Magnesium Deficiency. *Arch Intern Med* 1992; 152:40.
- 422 17. Pickham D, Helfenbein E, Shinn JA, et al.: High prevalence of corrected QT interval  
423 prolongation in acutely ill patients is associated with mortality: Results of the QT in Practice  
424 (QTIP) Study\*. *Critical Care Medicine* 2012; 40:394–399.
- 425 18. Bernardi M, Calandra S, Colantoni A, et al.: Q-T interval prolongation in cirrhosis:  
426 Prevalence, relationship with severity, and etiology of the disease and possible pathogenetic  
427 factors. *Hepatology* 1998; 27:28–34.
- 428 19. Ziegler D: Diabetic cardiovascular autonomic neuropathy: Prognosis, diagnosis and  
429 treatment. *Diabetes Metab Rev* 1994; 10:339–383.
- 430 20. Perez Alday EA, Gu A, Shah A, et al.: Classification of 12-lead ECGs: The  
431 PhysioNet/Computing in Cardiology Challenge 2020 [Internet]. PhysioNet, [cited 2024 Dec  
432 11],. Available from: <https://physionet.org/content/challenge-2020/1.0.2/>

433

# Simplified Egg and Changing Yolk Model User Manual (version 1.0)

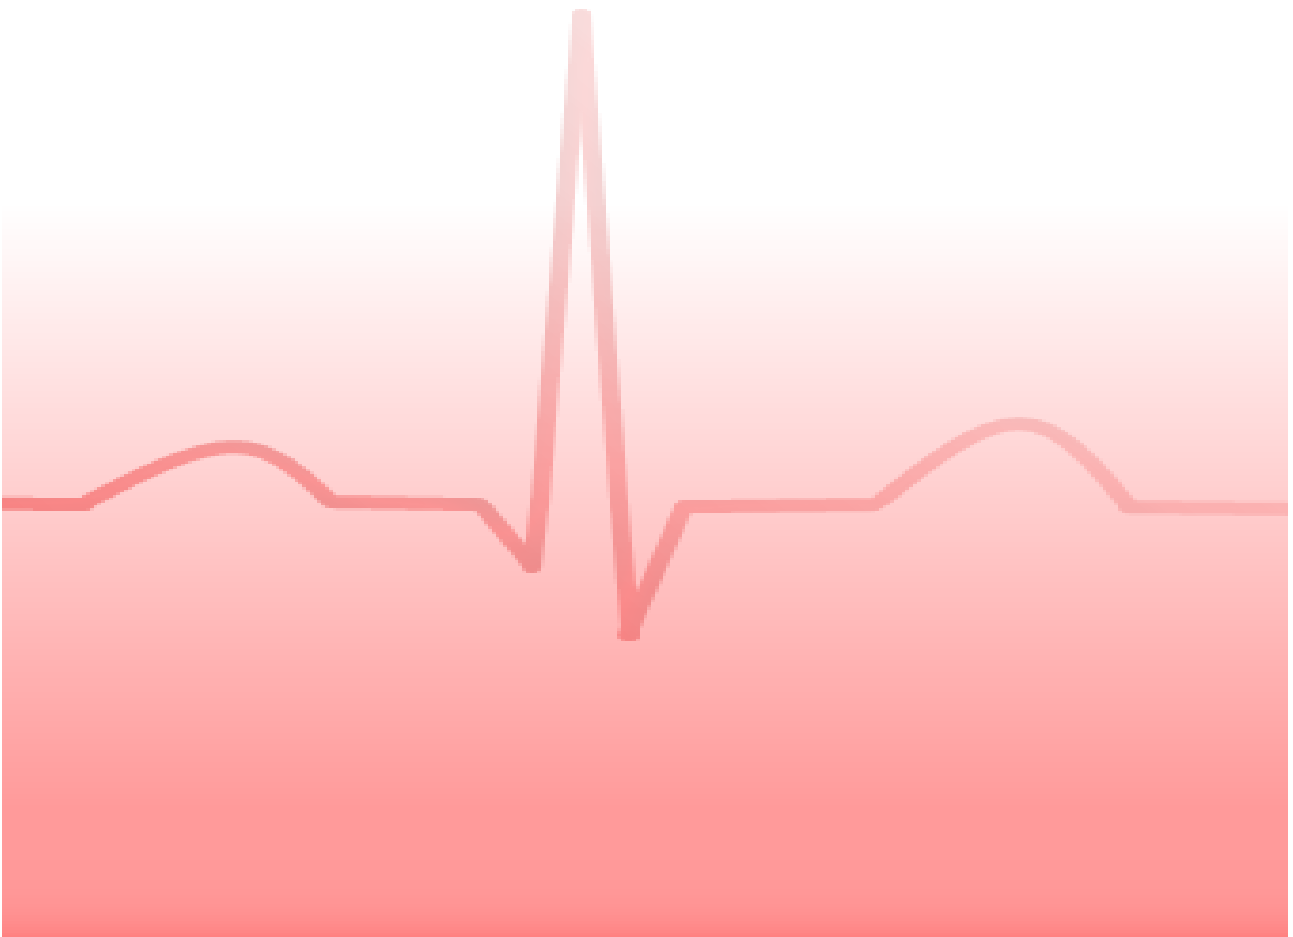

| <b>Contents</b>                         | <b>Page No.</b> |
|-----------------------------------------|-----------------|
| 1. Overview .....                       | 2               |
| 2. Instructions .....                   | 2               |
| 3. Damage Location Selection .....      | 3               |
| 4. Choosing Damage Severity .....       | 3               |
| 5. Hypertrophy Allocation .....         | 4               |
| 6. Presets Selection .....              | 5               |
| 7. Running the Simulation .....         | 5               |
| 8. Hot Tips for Using the Model .....   | 6               |
| 9. Known issue(s) .....                 | 7               |
| Research Team and Contact Details ..... | 7               |

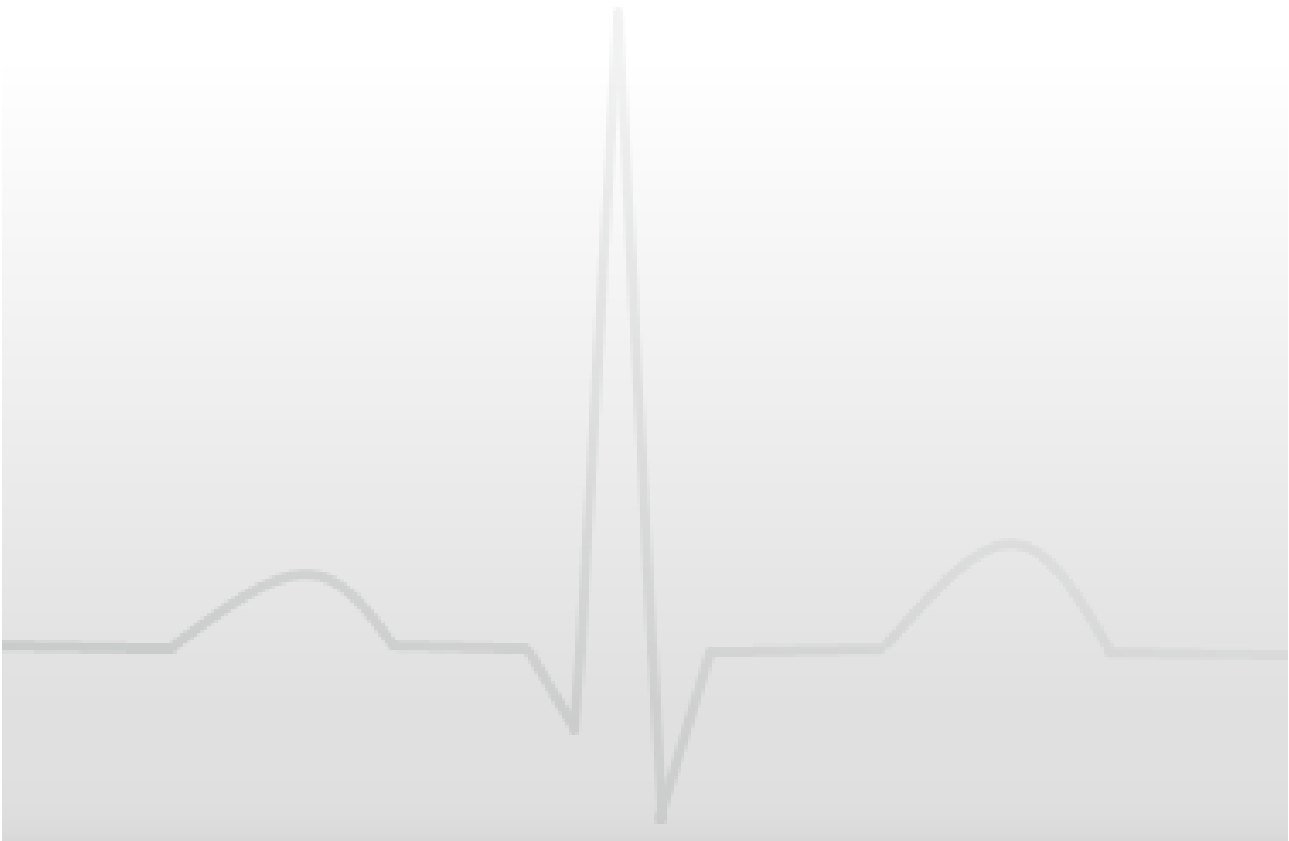

## 1. Overview

This web tool models the ventricular repolarisation, which is currently thought to be the ST and T wave segments on an electrocardiograph (ECG) trace. In the model, the heart is simplified to a mass of muscle in the form of an 'egg' shape. Here, the vector for lead V5 is seen as passing through the long axis of the egg shape. The repolarisation trace represents the calculated electrical deflection as seen in lead V5 over time. The model allows you to allocate the severity and location of any hypertrophy and/or damage to see the effects on the repolarisation trace.

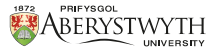

Department of Computer Science

Simplified Egg and Changing Yolk Model

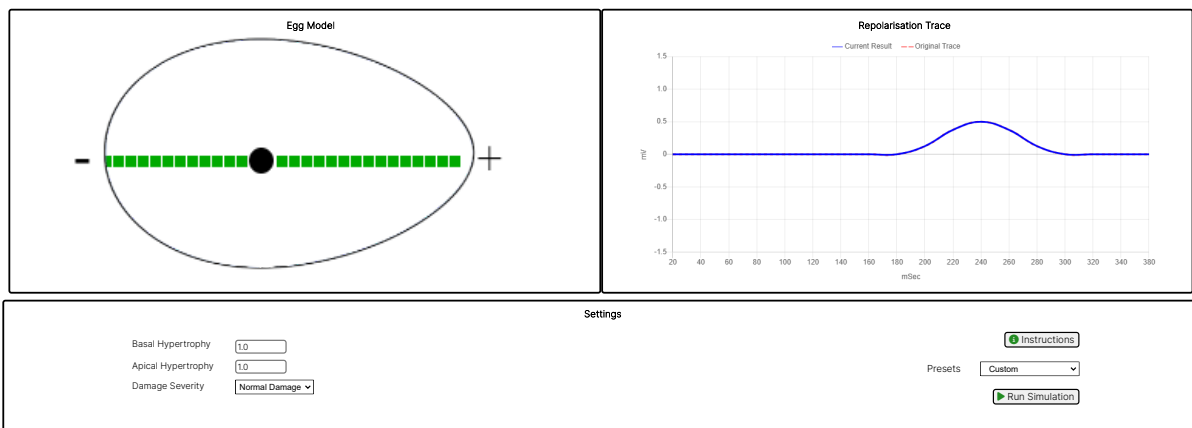

This work is based on the paper from the [link](#)  
Our Research Team: Faisal I. Rezwan, Arvind Mistry, John Cannon, Kieran Stone, Daniel Cyrus, Ignacy Mokrzcki  
Developers: Daniel Cyrus, Arvind Mistry  
Contact: [Faisal I. Rezwan](#)

[User Manual](#)

## 2. Instructions

In this web tool, you can select the 'Instructions' button at any time to see the different elements and functions of the model. These instructions will appear in green pop-up boxes. The pop-up boxes disappear when any other selection is subsequently made.

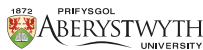

Department of Computer Science

Simplified Egg and Changing Yolk Model

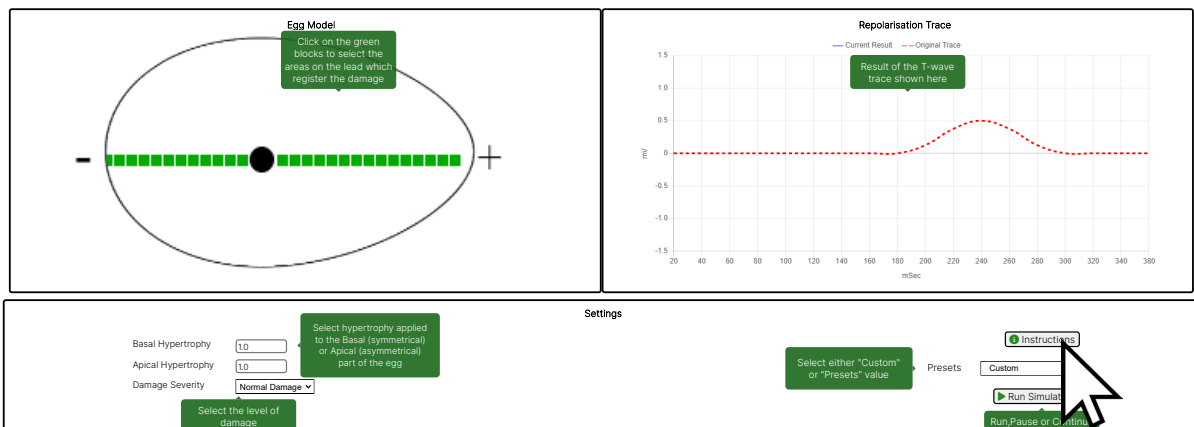

This work is based on the paper from the [link](#)  
Our Research Team: Faisal I. Rezwan, Arvind Mistry, John Cannon, Kieran Stone, Daniel Cyrus, Ignacy Mokrzcki  
Developers: Daniel Cyrus, Arvind Mistry  
Contact: [Faisal I. Rezwan](#)

[User Manual](#)

### 3. Damage Location Selection

You can allocate the areas where any damage is registered on lead V5 by clicking the selected green blocks on the egg. The green block will change to red indicating where the damage is registered. By clicking the (red) block again, you can undo any damage and the block will reset to green.

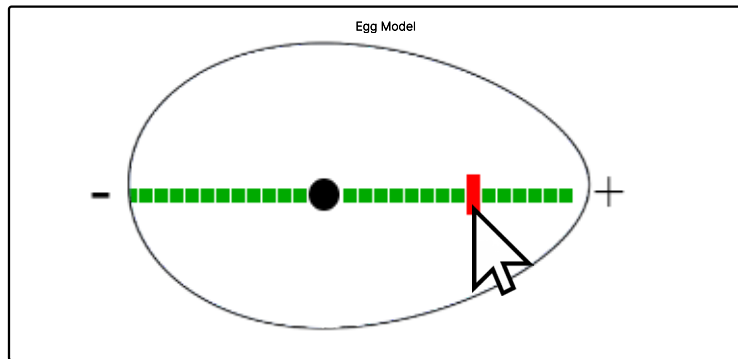

### 4. Choosing Damage Severity

You can select either 'Normal' or 'Severe' levels of damage to be applied to the damaged areas of egg. This allows this model to allocate a higher level of damage for demonstrating certain conditions, such as flattened and inverted T waves.

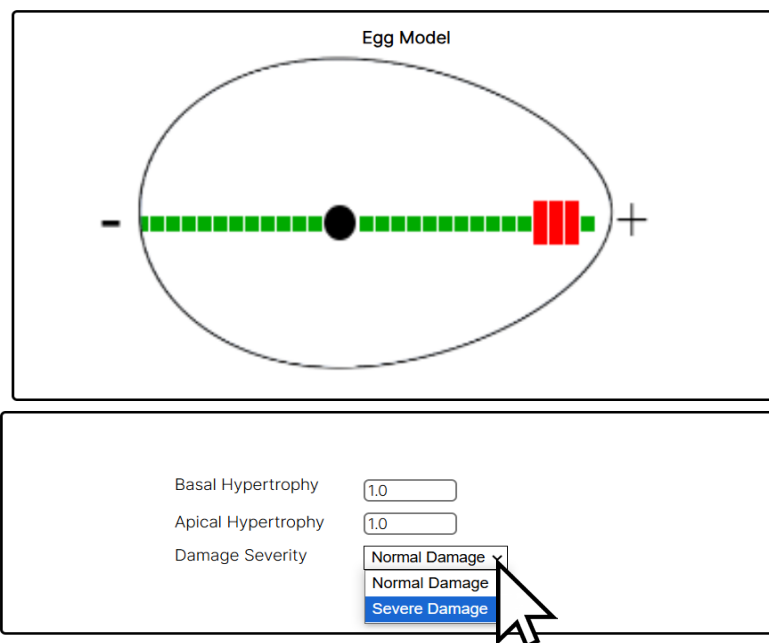

## 5. Hypertrophy Allocation

You can select the level of 'Basal' and or 'Apical' hypertrophy to be applied to the model. Basal applies hypertrophy to the 'symmetrical' part or body of the egg shape. Apical applies hypertrophy to the 'asymmetrical' to apex part of the egg shape.

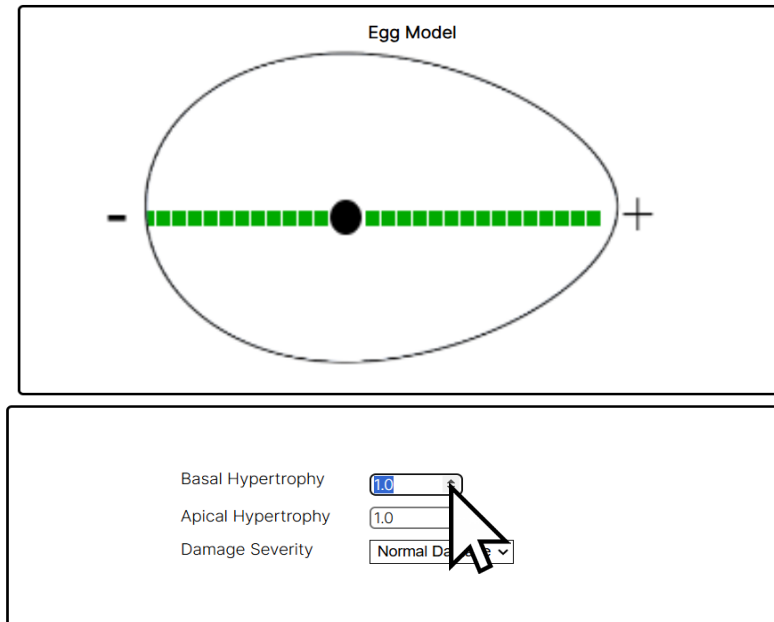

The range of hypertrophy that can be allocated in this simplified model is between 1.0 and 2.0. Allocating 1.0 for either Basal or Apical Hypertrophy means that those parts are normal and there is no allocated hypertrophy at those sites. By allocating more than 1.0 hypertrophy means that area of the model has some hypertrophy.

For example, if hypertrophy is applied to the apical part of the egg model **without** any allocated damage, then this will result in a higher T wave in the repolarisation trace. If any damage is allocated to a hypertrophied part of the egg, then this will have a greater 'damage' effect on the repolarisation trace.



## 6. Presets Selection

As an alternative to 'Custom' adjusting the settings, you can pre-select damaged and hypertrophy areas by selecting one of eleven 'Presets'.

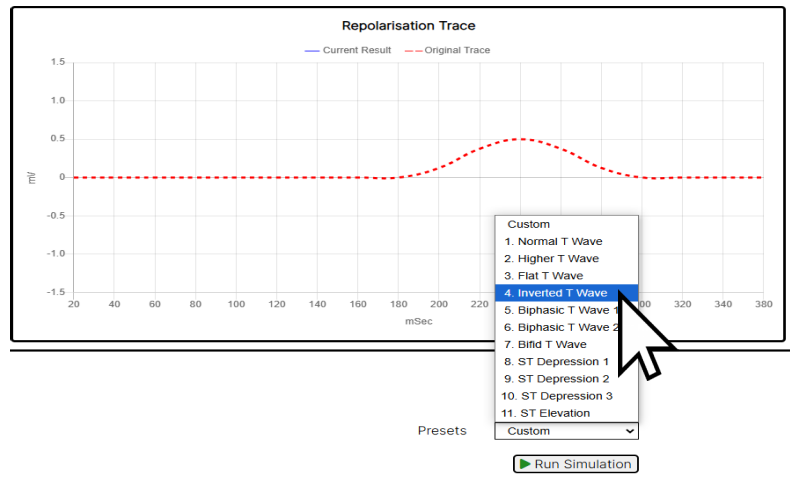

The theory underpinning these Presets are discussed in the paper linked to this model.

## 7. Running the Simulation

When the 'Run Simulation' button is selected the model will calculate and display the resulting repolarisation trace for this simplified model. Deviations from the original repolarisation trace indicate hypertrophy and/or damage to the heart.

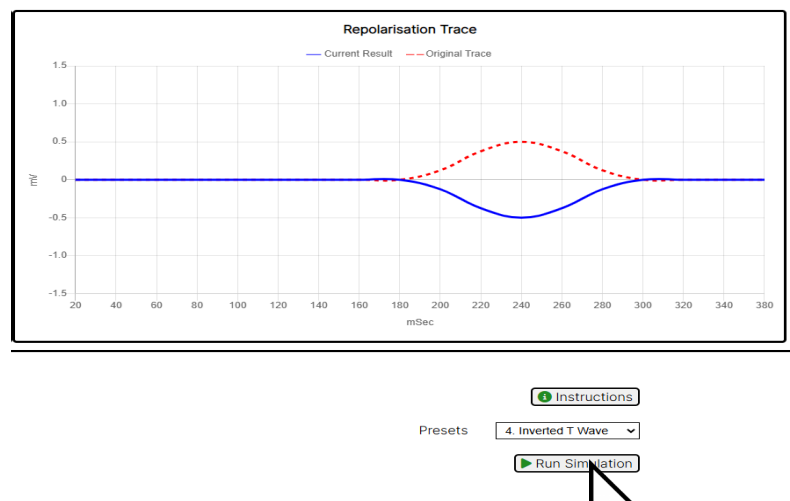

the paper from the [link](#)  
n Cannon, Kieran Stone, Daniel Cyrus, Ignacy Mokrzecki  
Cyrus, Arvind Mistry  
[salj.Rezwan](#)

[User Manual](#)

## 8. Hot Tips for Using the Model

When selecting the 'Damage' blocks, it is best to select one, two or three adjacent blocks on one side of the egg to mimic a localised area of damage.

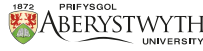

Department of Computer Science

Simplified Egg and Changing Yolk Model

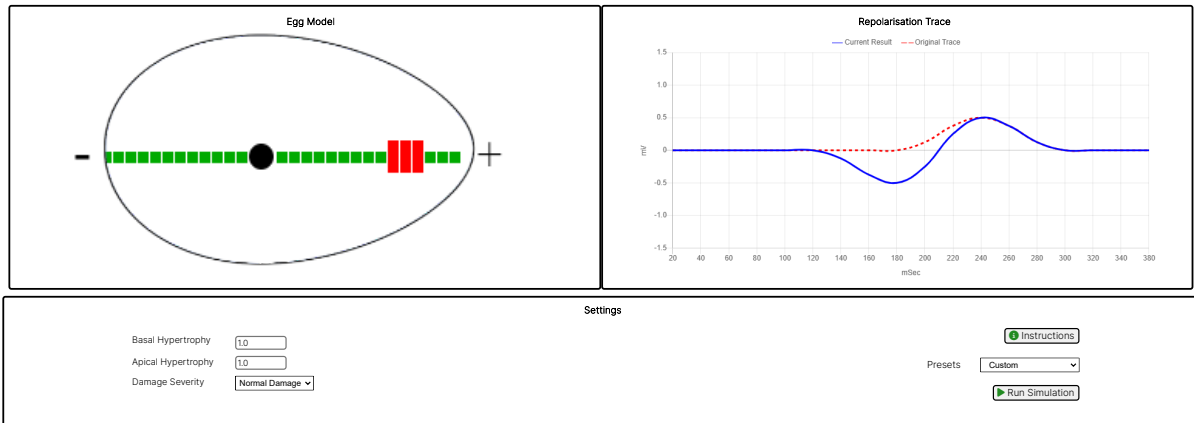

This work is based on the paper from the [link](#)  
Our Research Team: [Faisal I. Rezwan](#), [Arvind Mistry](#), [John Cannon](#), [Kieran Stone](#), [Daniel Cyrus](#), [Ignacy Mokrzecki](#)  
Developers: [Daniel Cyrus](#), [Arvind Mistry](#)  
Contact: [Faisal I. Rezwan](#)

[User Manual](#)

It is possible to have 'Damage' blocks on both sides of the egg shape, which results in various specialised configuration of the repolarisation trace. However, explanations of circumstances, when this would occur, are outside of the remit of this web tool. Please contact the research team for more detailed explanation.

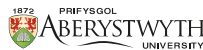

Department of Computer Science

Simplified Egg and Changing Yolk Model

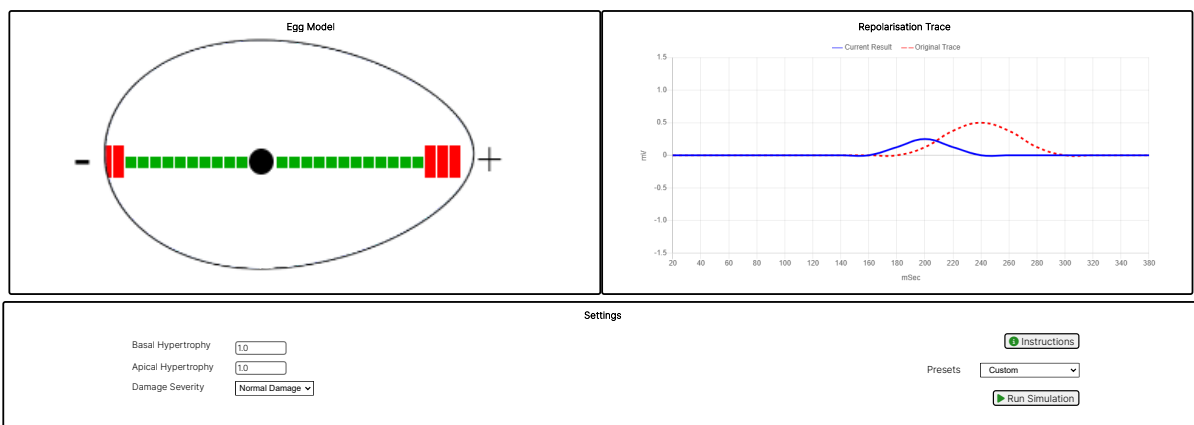

This work is based on the paper from the [link](#)  
Our Research Team: [Faisal I. Rezwan](#), [Arvind Mistry](#), [John Cannon](#), [Kieran Stone](#), [Daniel Cyrus](#), [Ignacy Mokrzecki](#)  
Developers: [Daniel Cyrus](#), [Arvind Mistry](#)  
Contact: [Faisal I. Rezwan](#)

[User Manual](#)

---

## 9. Known issue(s):

The texts inside green instruction pop-ups do not load properly in safari web browser in iOS. They only appear after refreshing the web tool.

### Research Team and Contact Details

This “Simplified Egg and Changing Yolk Model” has been developed by Aberystwyth University Computer Science Department as a part of the 3D ECG Project.

Developers: Daniel Cyrus and Arvind Mistry

Research Team: Faisal I. Rezwan (Project Lead), Arvind Mistry, John Cannon, Kieran Stone, Daniel Cyrus and Ignacy Mokrzecki

For any queries or support, please contact: [F.Rezwan@aber.ac.uk](mailto:F.Rezwan@aber.ac.uk)
